# Supplementary material for: A Dynamic Role of TBX3 in the Pluripotency Circuitry
Source: PubMed Central journal article supplement — Stem Cell Reports. 2015 Dec 8;5(6):1155–70. doi: 10.1016/j.stemcr.2015.11.003 (PMC4682344; doi:10.1016/j.stemcr.2015.11.003), 2015-12-08

## A Dynamic Role of TBX3 in the Pluripotency Circuitry

Ronan Russell,<sup>1,7</sup> Marcus Ilg,<sup>1,7</sup> Qiong Lin,<sup>2,7</sup> Guangming Wu,<sup>3,7</sup> André Lechel,<sup>1</sup> Wendy Bergmann,<sup>1</sup> Tim Eiseler,<sup>1</sup> Leonhard Linta,<sup>4</sup> Pavan Kumar P.,<sup>5</sup> Moritz Klingenstein,<sup>4</sup> Kenjiro Adachi,<sup>3</sup> Meike Hohwieler,<sup>1</sup> Olena Sakk,<sup>6</sup> Stefanie Raab,<sup>4</sup> Anne Moon,<sup>5</sup> Martin Zenke,<sup>2</sup> Thomas Seufferlein,<sup>1</sup> Hans R. Schöler,<sup>3</sup> Anett Illing,<sup>1,8</sup> Stefan Liebau,<sup>4,8</sup> and Alexander Kleger<sup>1,8,\*</sup>

<sup>1</sup>Department of Internal Medicine I, Ulm University, 89081 Ulm, Germany

<sup>2</sup>Department of Cell Biology, Institute for Biomedical Engineering, Medical Faculty, RWTH Aachen University, 52074 Aachen, Germany

<sup>3</sup>Department of Cell and Developmental Biology, Max Planck Institute for Molecular Biomedicine, 48149 Münster, Germany

<sup>4</sup>Institute of Neuroanatomy, Eberhard Karls University Tübingen, 72074 Tübingen, Germany

<sup>5</sup>Weis Center for Research, Geisinger Clinic, Danville, PA 17822, USA

<sup>6</sup>Core Facility Transgenic Mice, Ulm University, 89081 Ulm, Germany

<sup>7</sup>Co-first author

<sup>8</sup>Co-senior author

\*Correspondence: [alexander.kleger@uni-ulm.de](mailto:alexander.kleger@uni-ulm.de)

<http://dx.doi.org/10.1016/j.stemcr.2015.11.003>

This is an open access article under the CC BY-NC-ND license (<http://creativecommons.org/licenses/by-nc-nd/4.0/>).

### SUMMARY

Pluripotency represents a cell state comprising a fine-tuned pattern of transcription factor activity required for embryonic stem cell (ESC) self-renewal. TBX3 is the earliest expressed member of the T-box transcription factor family and is involved in maintenance and induction of pluripotency. Hence, TBX3 is believed to be a key member of the pluripotency circuitry, with loss of TBX3 coinciding with loss of pluripotency. We report a dynamic expression of TBX3 in vitro and in vivo using genetic reporter tools tracking TBX3 expression in mouse ESCs (mESCs). Low TBX3 levels are associated with reduced pluripotency, resembling the more mature epiblast. Notably, TBX3-low cells maintain the intrinsic capability to switch to a TBX3-high state and vice versa. Additionally, we show TBX3 to be dispensable for induction and maintenance of naive pluripotency as well as for germ cell development. These data highlight novel facets of TBX3 action in mESCs.

### INTRODUCTION

Pluripotent stem cells (PSCs) are characterized by continuous self-renewal while maintaining the potential to differentiate into cells of all three germ layers. Great knowledge exists about the regulatory networks that maintain pluripotency and about key players that regulate differentiation. Pluripotency exists in various states, with the ground state of naive pluripotency as the most basic state of pluripotency (Chen et al., 2013; Leitch et al., 2013; Wray et al., 2010). Here, diverse signaling pathways, in concert with a combination of key transcription factors (TFs), precisely regulate ground state conditions. Diminutive changes in their expression can either destabilize or strengthen the network (Karwacki-Neisius et al., 2013). Several network TFs are heterogeneously expressed (Chambers et al., 2007; Festuccia et al., 2012; Kalmar et al., 2009; MacArthur et al., 2012; Miyazari and Torres-Padilla, 2012; Papatsenko et al., 2015) and regulated in a highly dynamic manner to balance between stem cell self-renewal and exit from pluripotency (Faddah et al., 2013; Radzishewska et al., 2013) as well as during somatic reprogramming (Takahashi and Yamanaka, 2006). Finally, even core TFs of the pluripotency network determine the exit from stemness to early cell fate determination in a competitive manner

(Lu et al., 2011; Teo et al., 2011; Waghay et al., 2015; Weidgang et al., 2013).

The T-box family of TFs is involved in a variety of signaling cascades including the pluripotency network (Niwa et al., 2009). TBX3 mutually regulates the expression of key lineage TFs factors while maintaining and inducing pluripotency (Han et al., 2010a; Weidgang et al., 2013). In detail, TBX3 is directly bound by NANOG and in turn binds OCT4 and SOX2 (Han et al., 2010a). Its expression is regulated in part by the phosphatidylinositol-3-OH-kinase-Akt (PI3K) and mitogen-activated protein kinase (MAPK) pathways (Niwa et al., 2009). Moreover, TBX3 can bypass the requirement for leukemia inhibitory factor (LIF) signaling and functions upstream of NANOG in PSCs (Niwa et al., 2009). Removal of TBX3 from embryonic stem cells (ESCs) causes differentiation (Han et al., 2010a; Ivanova et al., 2006; Lee et al., 2012; Lu et al., 2011; Nishiyama et al., 2013). In contrast, TBX3 is also a crucial player in early cell fate events, driving mesendodermal and primitive endoderm (PE) specification (Kartikasari et al., 2013; Lu et al., 2011; Waghay et al., 2015; Weidgang et al., 2013). Here, we provide a comprehensive view on the definitive requirements for TBX3 to maintain and induce pluripotency and precisely characterize various TBX3-expression states in PSCs.

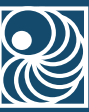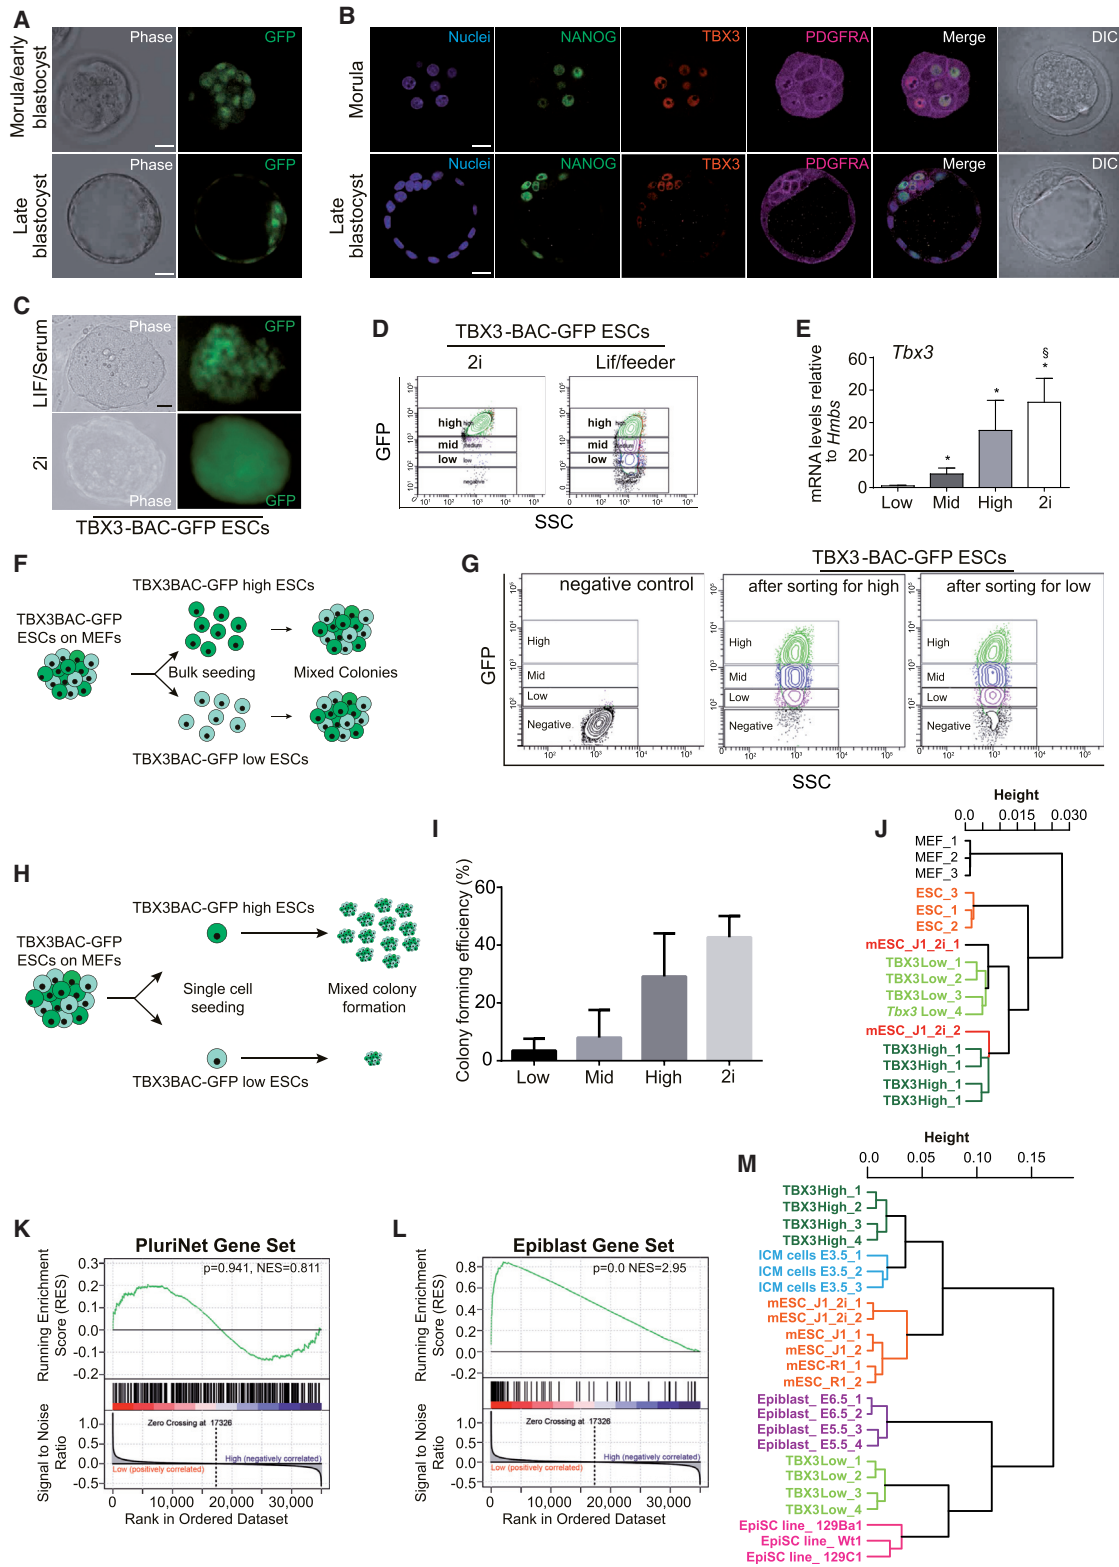

**Figure 1. TBX3 Is Dynamically Expressed in Mouse ESCs**

(A) TBX3<sup>+ven</sup> pre-implantation embryos at indicated time points.

(B) Wild-type pre-implantation embryos stained for NANOG (green), TBX3 (red), and PDGFRA (purple). Hoechst 33342 is shown (nuclei, blue).  
(legend continued on next page)

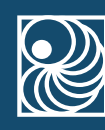

## RESULTS

### TBX3 Is Dynamically Expressed in mESCs

Heterogeneous expression of pluripotency TFs is present under various culture conditions, to date focused on the TF Nanog (Dietrich and Hiragi, 2007; Xenopoulos et al., 2015). Heterogeneous *Tbx3* expression has been reported in mouse ESCs (mESCs) (Niwa et al., 2009; Toyooka et al., 2008). The relevance of such heterogeneity in vitro remains divisive in vivo. To access TBX3 expression in vivo, we used a mouse strain containing a Venus-cassette (ven) to disrupt and track endogenous TBX3 locus activity (Kunasegaran et al., 2014). We observed a heterogeneous venus signal tracking TBX3 protein in both morula and blastocyst stages of murine embryos (Figure 1A). Immunohistochemistry (IHC) of wild-type embryos confirmed this observation, where NANOG-positive epiblast (EPI) cells express varying levels of TBX3 (Figure 1B). Interestingly, the inner cell mass (ICM) cells with high TBX3 expression tend to have increased PDGFRA and decreased NANOG expression, suggestive of a PE cell fate. In contrast, low TBX3 expression correlates with high NANOG expression, indicative of an EPI fate.

For a global overview on *Tbx3* expression in vivo at early developmental stages, we performed in silico analyses of published datasets investigating single-cell transcriptomes of morula and blastocyst stages (Blakeley et al., 2015; Deng et al., 2014; Piras et al., 2014). Violin plots depict a bimodal expression of *Nanog* and *Tbx3*, whereas *Oct4* expression recapitulates a described increase of transcriptional noise with ongoing development (Piras et al., 2014) and separates just upon ICM and trophoctoderm (TE) segregation (Figures S1A–S1D). Next, we applied a defined gene signature of 48 TFs capable to segregate the three lineages in pre-implantation embryos, namely PE, EPI, both defining the ICM, and TE (Guo et al., 2010). This gene signature separates two cell populations as early as in the 16-cell stage, which could be allocated to the later putative ICM and

TE (Figure S1E). This separation becomes more evident with ongoing development and maximizes in the late blastocyst (Figures S1F and S1G). All clustered samples indicate heterogeneous single-embryonic-cell *Tbx3* expression in vivo across both lineages (ICM and TE). Moreover, *Tbx3* closely clusters with distinct TFs in the three embryonic stages regulating different lineages, supporting its role for lineage segregation (Figures S1E–S1G). We used this single-cell-based transcriptional lineage segregation to illustrate heterogeneous *Tbx3* expression (Figures S1H–S1J). Box plots illustrate the greater heterogeneity of *Tbx3* compared to *Oct4* in the ICM, most evident in the early blastocyst (Figure S1I). Finally, for each gene in the signature, we calculated Pearson correlation for *Tbx3* using all single embryonic cells at the late blastocyst stage to identify genes being positively or negatively correlated with *Tbx3* (Figure S1K). We note that TBX3-high in vivo may bias toward PE (high correlation with *Pdgfra*), thus recapitulating our immunostainings for PDGFRA presented in Figure 1B. In pre-implantation embryos, *Tbx3* expression mostly restricts to the ICM as shown by the negatively correlated TE markers (*Eomes* and *Cdx2*; Figure S1K).

To verify TBX3 heterogeneity observed in vivo in more detail, we used a transgenic TBX3<sup>GFP</sup> (TBX3-BAC-EGFP) reporter mouse, well correlating with endogenous TBX3 protein levels (Horsthuis et al., 2009). We avoided the TBX3-Venus system in that context to exclude the potential of a TBX3 haploinsufficiency phenotype and due to previous reports showing conflicting results for different *Nanog* knockin reporters (Frank et al., 2013; Miyanari and Torres-Padilla, 2012). Moreover, recently, a BAC-NANOG reporter was shown to be a reliable tool for tracing *Nanog* expression in mESCs (Xenopoulos et al., 2015). Here, we isolated mESCs from the ICM of this strain to serve as a live-time TBX3 tracking tool in vitro (Figure 1C). Under LIF/feeder conditions, we observed differential GFP expression, representing a spectrum of endogenous TBX3

(C) Representative phase contrast and GFP fluorescent images of de-novo-derived TBX3-BAC-EGFP mESCs cultured under indicated conditions. The scale bars represent 20  $\mu$ m.

(D) TBX3-BAC-EGFP expression fluctuates under indicated culture conditions.

(E) qPCR for *Tbx3* of TBX3-BAC-EGFP low, mid, and high sorted cells (according to D).  $n = 4$ ; two individual clones from two independent experiments)

(F and G) Experimental sorting strategy and schematic results (F) of (G);  $n = 2$ , two independent clones.

(H and I) Sorting strategy and schematic results (H) of (I). Two out of four independent experiments with similar results are shown. For 2i condition,  $n = 2$ .

(J) Hierarchical clustering of gene expression profiles of TBX3<sup>GFP</sup>-high and -low ESCs with published pluripotent and somatic cells (GSE11274 and GSE58735).

(K and L) Gene set enrichment analysis shows no bias of pluripotent marker genes between TBX3<sup>GFP</sup>-high (high) and -low (low) ESCs (J) but a bias to epiblast (K) in TBX3<sup>GFP</sup>-low ESCs.

(M) Hierarchical clustering shows that TBX3<sup>GFP</sup>-low ESCs (TBX3 low) cluster close to EpiSCs and epiblast (E5.5/6.5), TBX3<sup>GFP</sup>-high ESCs (TBX3 high) are close to published ESCs (J1, R1), 2i-treated ESCs (J1\_2i), and E3.5 inner cell mass (ICM cells E3.5; GSE58735 and GSE35416).

See also Figures S1 and S2.

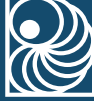

expression levels. In contrast, under feeder-free 2i conditions (Frum et al., 2013; Niwa et al., 2009), GFP was homogeneously expressed at high levels (Figures 1C, 1D, and S2A). Consequently, we performed FACS of LIF/feeder ESCs and isolated ESCs expressing high, mid, or low levels of TBX3<sup>GFP</sup>. As expected, reporter intensity reflects endogenous *Tbx3* expression (Figures 1D and 1E), further mirrored by single-cell qPCR (Figure S2B). To investigate whether TBX3<sup>GFP</sup>-low or TBX3<sup>GFP</sup>-high ESCs can switch from one condition to the other, we sorted ESCs for respective GFP states into low- and high-expressing populations (Figure 1F). Both subpopulations regenerated bona fide ESC cultures. TBX3<sup>GFP</sup>-low cells generated colonies containing TBX3<sup>GFP</sup>-high cells and vice versa (Figure 1G). Interestingly, colony-forming efficiency was lower for single TBX3<sup>GFP</sup>-low ESCs compared to TBX3<sup>GFP</sup>-high cells. However, both gave rise to heterogeneous colonies. As expected, 2i cultures of TBX3-BAC-EGFP cells displayed highest clonal growth rates (Figures 1H and 1I).

Next, we compared transcriptional profiles of TBX3<sup>GFP</sup>-low and TBX3<sup>GFP</sup>-high mESCs (LIF/feeder) and observed a differentially regulated gene signature (Figure S2C; Tables S2, S3, and S4). Hierarchical clustering with mouse embryonic fibroblasts (MEFs) and reference ESC sets positioned TBX3-high and -low cells to the pluripotent references, excluding that TBX3-low cells simply represent differentiating ESCs (Figure 1J). PluriNet has been shown to define a common gene signature defining bona fide pluripotent cell types such as mESCs, induced pluripotent stem cells (iPSCs), and human oocytes (MacArthur et al., 2012; Müller et al., 2008). Applying this signature to TBX3<sup>GFP</sup>-low and TBX3<sup>GFP</sup>-high ESCs clearly illustrates the robust pluripotent state of both cell types (Figure 1K). Interestingly, TBX3<sup>GFP</sup>-low cells also showed enrichment for transcripts expressed in EPI stem cells (Figures 1L [Nora et al., 2012] and S2D [Kurek et al., 2015]). Next, we correlated TBX3<sup>GFP</sup>-low and TBX3<sup>GFP</sup>-high cells relative to published datasets from EpiSCs and E5.5/6.5 EPIs and from ESCs and E3.5 ICM. Consistent with the above findings, TBX3<sup>GFP</sup>-low cells clustered closer to EPI and EpiSCs than to ESCs and vice versa, whereas TBX3<sup>GFP</sup>-high cells clustered closely to the ICM, similar to reference ESCs cultured under 2i conditions (Figure 1M).

### Low Levels of *Tbx3* Restrict Developmental Potential In Vivo

Finally, we performed embryo aggregation assays using freshly sorted LV-mCherry-labeled TBX3<sup>GFP</sup>-low or TBX3<sup>GFP</sup>-high cells and wild-type E2.5 embryos (Figure 2A). Both cell populations were capable to integrate into the ICM as observed by the constitutively expressed mCherry reporter at E3.5 (Figures 2B and 2C). 120 aggregates from each population were transferred to pseudopregnant mice

for further development. Sixty-nine and 28 embryos from the TBX3<sup>GFP</sup>-low and TBX3<sup>GFP</sup>-high aggregates were recovered, of which 14 (20.3%) and 22 (78.6%) were classified to be chimeric (Figure 2D). Notably, very similar numbers of embryos implanted, although a lower number of fetuses was recovered from the TBX3<sup>GFP</sup>-high cell population. We hypothesize that the high contribution ability of TBX3<sup>GFP</sup>-high mESCs may limit the survival rate of this group as described previously (Gertsenstein et al., 2010). Chimeric embryos recapitulated previously reported *Tbx3*-expression patterns as seen by the BAC-EGFP signal (Figure 2E; Horsthuis et al., 2009). Interestingly, the frequency of TBX3-low chimeric embryos was overall significantly lower (Figure 2D). Unfortunately, the LV-mCherry reporter appeared to be silenced in all embryos, impeding a more detailed characterization of chimerism. This highlights that TBX3-low ESCs have a significantly reduced potential for in vivo contribution to chimeric embryos, underpinning our in vitro observations that a TBX3-low state represents a differentiation-poised but pluripotent state.

### Tbx3 Is Dispensable to Establish and Maintain Pluripotency

Because the spectrum of TBX3-low and -high expression is compatible with pluripotency, we investigated genetic ablation of TBX3 in induction and maintenance of pluripotency. First, low passage TBX3<sup>+/+</sup> and TBX3<sup>-/-</sup> MEFs (Frank et al., 2013; Kumar et al., 2014) were assayed for reprogramming toward iPSCs. These MEFs did not show significant differences in their proliferative capacity over three passages (data not shown). Interestingly, alkaline phosphatase (AP)-positive iPSC colonies appeared in similar numbers in TBX3<sup>-/-</sup> MEFs compared to wild-type controls (Figures 3A–3C). We also assessed colony formation kinetics by counting iPSC-like colonies without observing any difference. Using higher passages of TBX3<sup>-/-</sup> MEFs led to fewer iPSC colonies (data not shown). This observation would be in line with previously reported data showing that CAPER $\alpha$ /TBX3 repressor complex is required to prevent senescence, the latter representing an established barrier for reprogramming (Banito et al., 2009; Kumar et al., 2014). Indeed, TBX3 mRNA and protein were absent in TBX3<sup>-/-</sup> iPSC lines (Figures 3D and 3E). These colonies displayed normal dome-shaped morphology and pluripotency marker expression (Figures 3F and S3A). Transcriptome cluster analysis of TBX3<sup>-/-</sup> iPSCs further confirmed pluripotency (Figure 3G). To complement these findings, we investigated again the TBX3-Venus mouse strain (see also Figure 1A). Mating heterozygous mice with subsequent embryo isolation allowed us to culture E3.5 blastocysts for de novo ESC derivation (Czechanski et al., 2014). From 24 blastocysts, 22 ESC lines were expanded, 3 TBX3<sup>+/+</sup>, 11 TBX3<sup>ven/+</sup>, 7 TBX3<sup>ven/ven</sup>, and 1 line

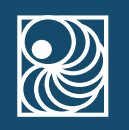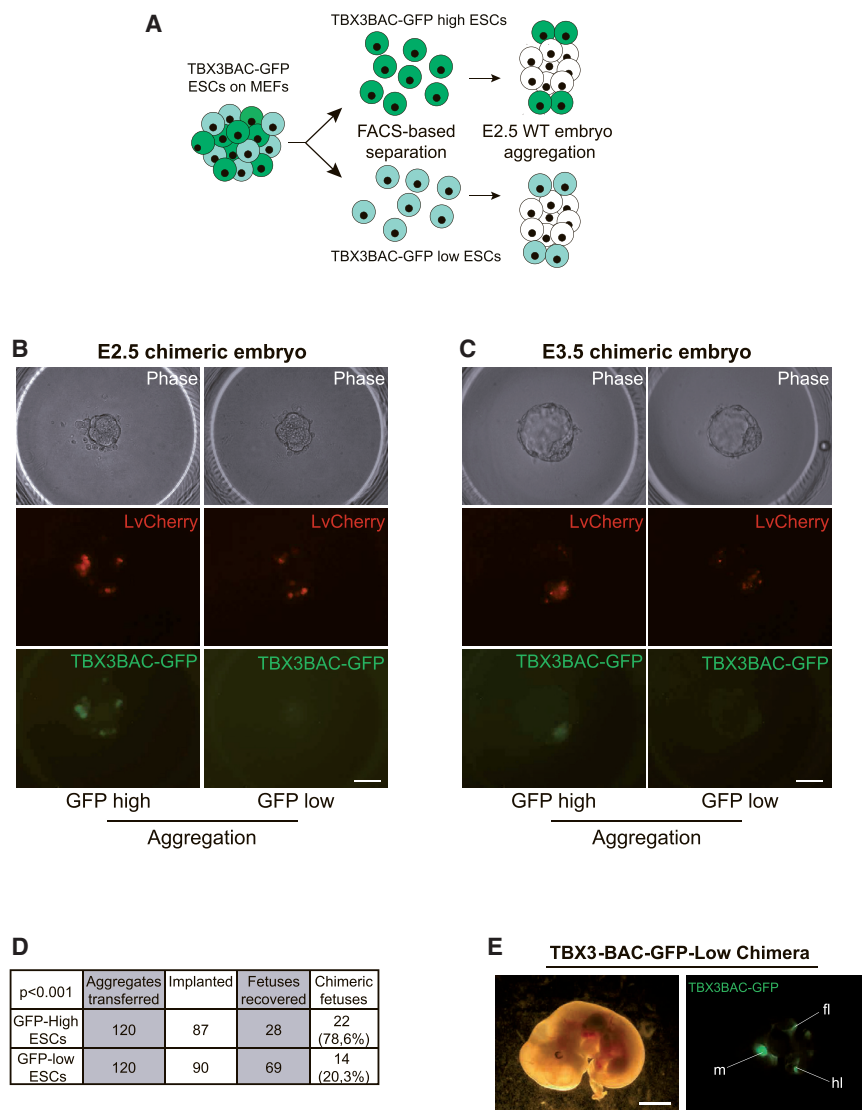

**Figure 2. Low Levels of *Tbx3* Restrict Developmental Potential In Vivo**

(A) Scheme of sorting strategy and 2n aggregation assay with E2.5 embryos.

(B and C) Generation of chimeric embryos by aggregating TBX3-BAC-EGFP high/low ESCs infected with LvCherry lentivirus with 2n E2.5 embryos (B) and ESCs integrated into ICM of chimeric blastocysts after 24 hr in culture (E3.5). (C) Top, phase contrast; middle, LvCherry signal for lentiviral labeling of cells to ensure visualization; bottom, GFP signal of the TBX3-BAC-EGFP high and low ESCs.

(D) Embryonic development from 2n embryo aggregation with TBX3<sup>GFP</sup>-high and -low ESCs.

(E) Phase contrast (left) and GFP fluorescence (right) of TBX3-BAC-EGFP-low chimera. fl, front limb; hl, hind limb; m, midbrain.

The scale bars represent 50  $\mu$ m (B and C) and 1 mm (E).

undetermined (Figure 3H). Morphology and marker staining confirmed pluripotency, whereas the Venus reporter signal localized to the outgrowing ICM (Figures 3I, S3B, and S3C). FACS analysis for the Venus reporter as well as mRNA and protein analysis confirmed the TBX3-null status (Figures 3J, 3K, S3D, and S3E).

### Tbx3 Is Dispensable for the Formation of “All-PSC”-Derived Mice and Germ Cell Development

A hallmark of PSCs is the ability to form teratomas and to generate chimeric embryos upon blastocyst injection. Indeed, TBX3<sup>-/-</sup> iPSCs generated teratomas (Figure 3L). Surprisingly, even diploid (2n) embryo aggregation of TBX3<sup>-/-</sup> ESCs led to high-grade chimeras at E9.5 (Figure S4A). Moreover, both TBX3<sup>-/-</sup> ESCs and iPSCs were capable of generating all-PSC-derived embryos (Figures

3M and S4A) in tetraploid (4n) embryo aggregation, the most stringent test for pluripotency (Stadtfield et al., 2010). In line with the previously reported TBX3<sup>-/-</sup> phenotype (Frank et al., 2013), all-PSC embryos (~85%) were found developmentally arrested and dead at E11.5 (Figure S4B; Table 1).

To assess germline contribution of TBX3<sup>-/-</sup> PSCs, we introduced an OCT4-EGFP reporter into tdTomato-labeled TBX3<sup>-/-</sup> iPSCs (Figure S4C). In a 2n aggregation assay, high germline contribution of TBX3<sup>-/-</sup> cells in five out of 12 E12.5 chimeric fetuses (presence of OCT4-EGFP-positive cells in gonads) indicated that TBX3 is not required for germ cell development (Figure 3N). Large clusters of OCT4-EGFP-positive spermatogonia stem cells (SSCs) were observed in the seminiferous tubules of a newborn mouse chimera (Figure 3O). However, the seminiferous

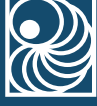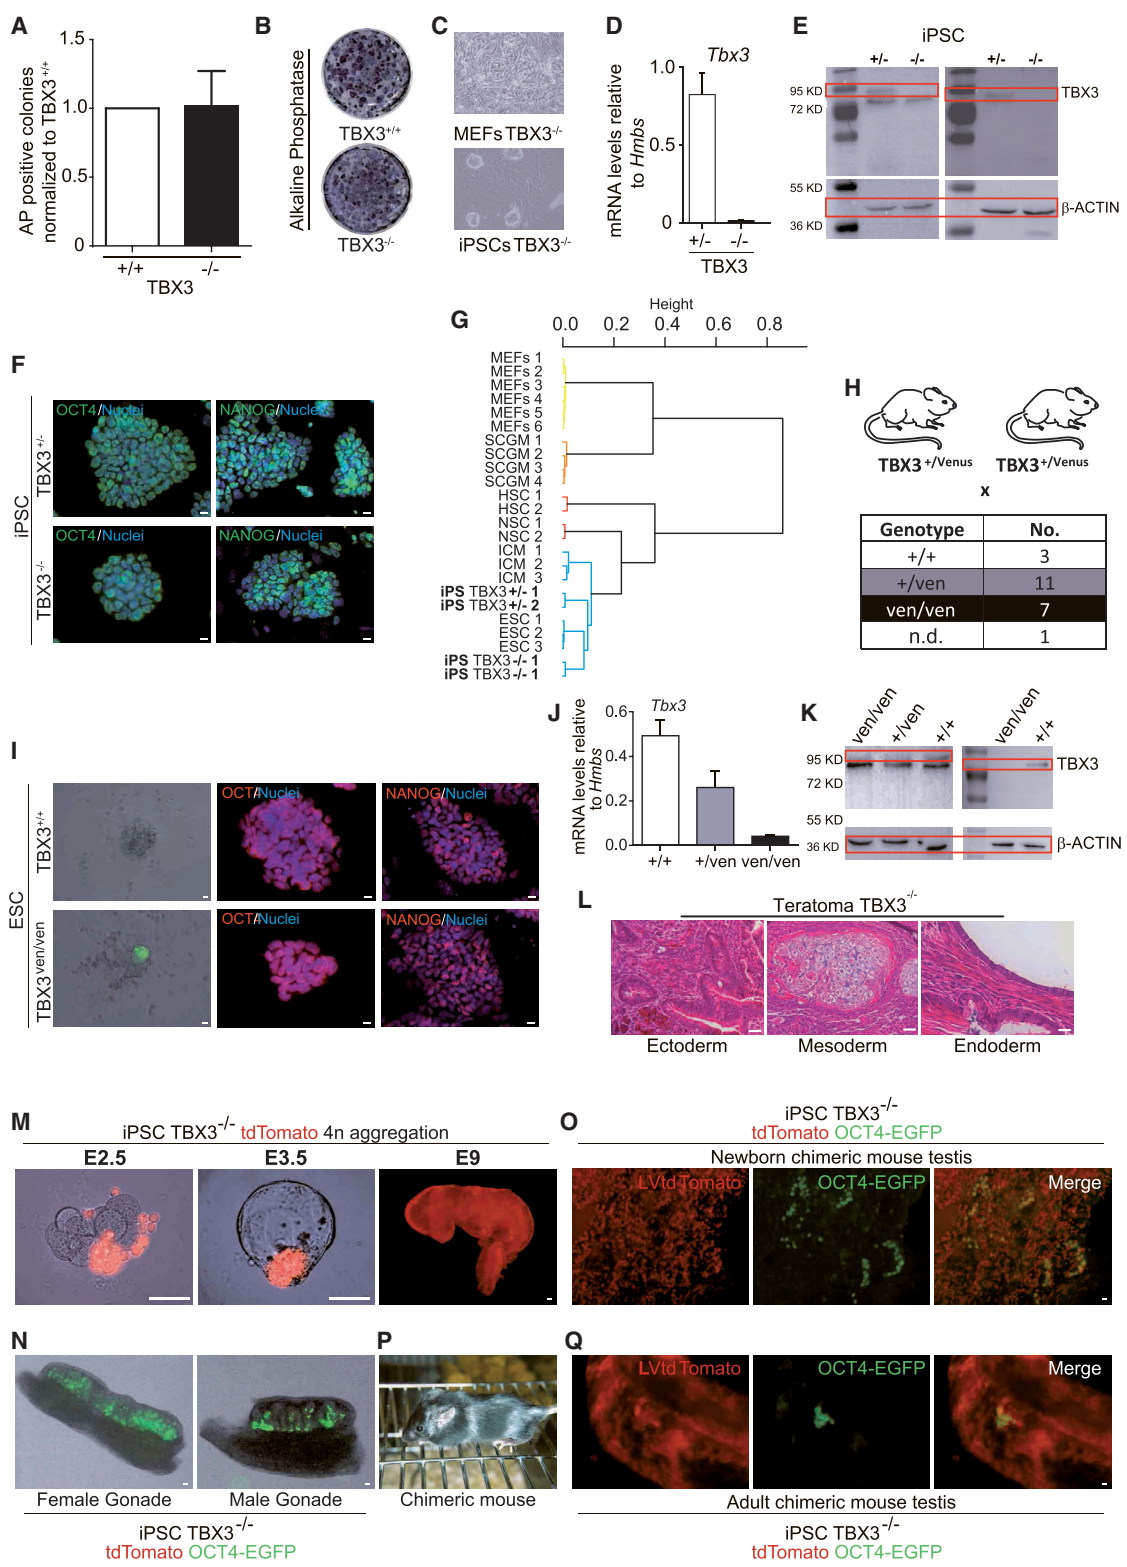

**Figure 3. *Tbx3* Is Dispensable to Induce and Maintain Pluripotency**

(A and B) Quantification (A) and representative AP<sup>+</sup> colonies (B) day 12 after reprogramming of TBX3<sup>+/+</sup> and TBX3<sup>-/-</sup> MEFs. Three independent experiments performed with triplicate technical replicates are shown.

(legend continued on next page)

**Table 1. Quantitative Overview of 2n and 4n Embryo Aggregation of the Indicated Cell and Genotypes**

| Cell Type                                   | Approach | Aggregation | Transferred | E9.5           |             | E11.5          |             | GFP Positive |
|---------------------------------------------|----------|-------------|-------------|----------------|-------------|----------------|-------------|--------------|
|                                             |          |             |             | Placenta Found | Fetus Found | Placenta Found | Fetus Found |              |
| iPSC TBX3 <sup>Δflox/Δflox</sup>            | 4n       | 50          | 47          | –              | –           | 41             | 6           | –            |
| iPSC TBX3 <sup>Δflox/Δflox</sup> + tdTomato | 4n       | 50          | 46          | 12             | 10          | 29             | 6           | –            |
| iPSC TBX3 <sup>Δflox/Δflox</sup> + tdTomato | 4n       | 40          | 40          | 20             | 8           | –              | –           | –            |
| iPSC TBX3 <sup>Δflox/Δflox</sup> + tdTomato | 2n       | 47          | 47          | 35             | 22          | –              | –           | –            |
| ESC TBX3 <sup>ven/ven</sup> Clone 4a        | 4n       | 20          | 20          | 19             | 14          | –              | –           | –            |
| ESC TBX3 <sup>ven/ven</sup> Clone 4a        | 2n       | 27          | 27          | 21             | 15          | –              | –           | –            |
| ESC TBX3 <sup>+/+</sup> Clone 21            | 4n       | 20          | 20          | 10             | 8           | –              | –           | –            |
| ESC TBX3 <sup>+/+</sup> Clone 21            | 2n       | 18          | 17          | 8              | 6           | –              | –           | –            |
| ESC TBX3 <sup>ven/ven</sup> Clone 5 + GFP   | 4n       | 54          | 53          | 40             | 8           | –              | –           | 8            |
| ESC TBX3 <sup>ven/ven</sup> Clone 5 + GFP   | 2n       | 48          | 48          | 41             | 24          | –              | –           | 13           |

tubules of an adult chimeric mouse showed very few and small clusters of OCT4-EGFP-positive cells, despite the presence of large amounts of tdTomato-positive TBX3<sup>-/-</sup>-iPSC-derived cells (Figures 3P and 3Q). Spermatozoa from this mouse were used for in vitro fertilization (IVF) with oocytes from B6C3F1 mice, but no germline transmission could be achieved in 44 developed blastocysts as judged by tdTomato and OCT4-EGFP fluorescence. In addition, a chimeric TBX3-null mouse gave rise to four litters with 54 F1 pups in total and none of them was RFP positive in

the somatic part or OCT4-EGFP positive in gonads. We conclude that, although TBX3 is not required for germ cell development, it seems to be essential for the maintenance of SSCs after birth.

### TBX3 Removal from the Pluripotency Circuitry Delays Lineage Commitment

Next, we investigated the cell-cycle profile of TBX3<sup>-/-</sup> ESCs using two complementary methods without observing significant differences compared to controls (Figures 4A and

- (C) Morphology of OKS-infected TBX3<sup>-/-</sup> MEFs (top) picked and expanded TBX3<sup>-/-</sup> iPSCs (bottom).  
 (D) *Tbx3* expression in TBX3<sup>+/-</sup> and (TBX3<sup>-/-</sup>) iPSCs. Two independent experiments performed with triplicate technical replicates are shown.  
 (E) TBX3 western blot in iPSCs (two different antibodies). Representative images of at least three independent experiments are shown.  
 (F) Pluripotency marker IHC in generated iPSCs of the indicated genotypes.  
 (G) Hierarchical clustering of gene expression profiles shows that iPSCs cluster with published ESC/ICM datasets.  
 (H) Crossing scheme to obtain TBX3<sup>ven/ven</sup>-null mice and overview of derivation frequency; ND, not determined.  
 (I) Pluripotency marker IHC in de novo ESCs of the indicated genotypes.  
 (J and K) TBX3 mRNA (J; three independent experiments performed with triplicate technical replicates) and protein (K) expression confirms TBX3-null phenotype in TBX3<sup>ven/ven</sup> ESCs (two TBX3 antibodies). Representative images of at least three independent experiments are shown.  
 (L) TBX3<sup>-/-</sup> iPSCs form teratomas with all three germ layers (ecto-, meso-, and endoderm) in NMRI mice.  
 (M) Generation of "all-PSC"-derived TBX3-null embryos using 4n embryo aggregation from TBX3<sup>-/-</sup> iPSCs. Developmental stage as indicated. To ensure visualization of TBX3-null progeny, TBX3<sup>-/-</sup> iPSCs were constitutively labeled with a tdTomato-expressing lentivirus (LVtdTomato).  
 (N) Germline contribution of TBX3<sup>-/-</sup> iPSCs carrying an OCT4-EGFP reporter and LVtdTomato after 2n aggregation assay in female (left) and male (right) gonads at E12.5.  
 (O) Representative fluorescent image of newborn chimeric mouse testis after 2n aggregation assay of OCT4-EGFP and LVtdTomato-infected TBX3<sup>-/-</sup> iPSCs.  
 (P) TBX3<sup>-/-</sup> iPSCs contribute to adult chimeric mice after 2n aggregation assay (light coat color).  
 (Q) Representative fluorescent image of adult chimeric mouse testis after 2n aggregation assay of OCT4-EGFP and LVtdTomato-infected TBX3<sup>-/-</sup> iPSCs.  
 The scale bars represent 50 μm. See also Figures S3 and S4.

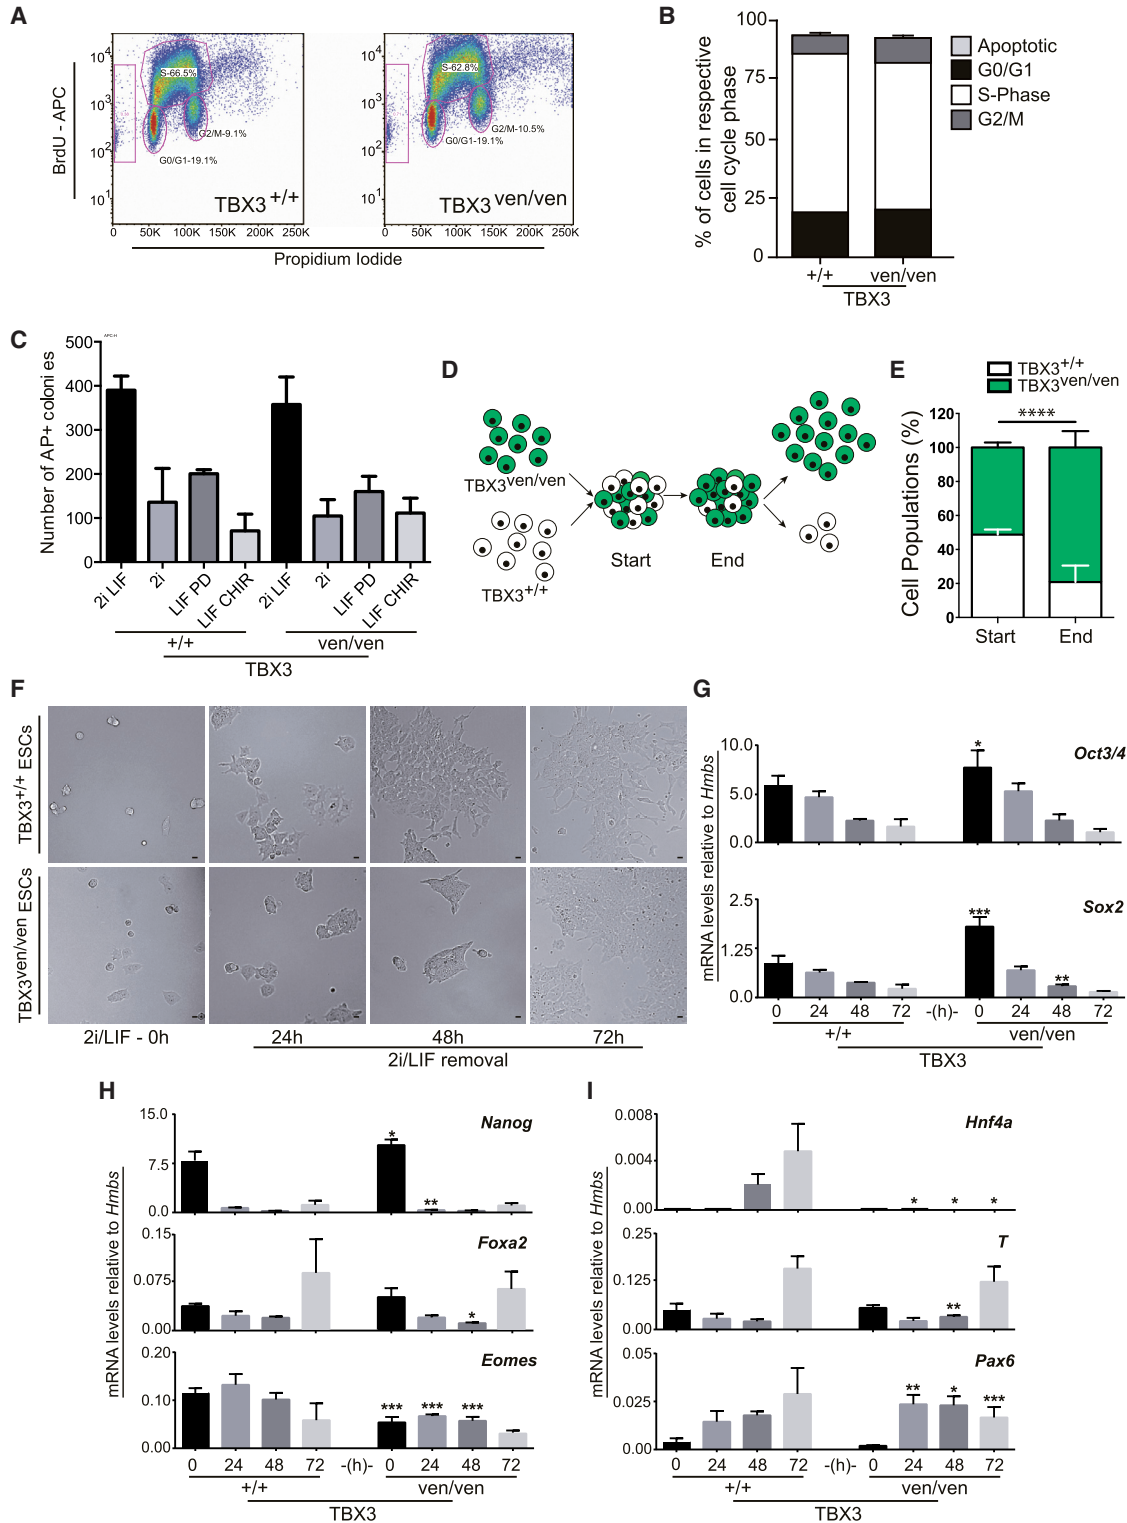

**Figure 4. Characterization of TBX3-Null ESCs**

(A) BrdU-FACS of TBX3<sup>ven/ven</sup> and TBX3<sup>+/+</sup> ESC lines. Gate at y axis, apoptotic cells; lower left circle, G0/G1 population; lower right circle, G2/M population; upper big gate, S phase.

(legend continued on next page)





4B; data not shown). Also, there was no difference in single-cell colony formation capacity in TBX3 wild-type versus null ESCs, irrespective of removal of any LIF/2i component. This indicates that LIF/STAT3, ERK, and GSK3 signaling is unperturbed in TBX3<sup>-/-</sup> cells (Figure 4C). Interestingly, TBX3<sup>-/-</sup> cells outperformed their wild-type counterparts in a cell competition assay, indicating enhanced self-renewal in TBX3<sup>-/-</sup> ESCs (Figures 4D and 4E). It has been shown that reducing OCT4 levels directs an even more robust pluripotent state (Karwacki-Neisius et al., 2013). On a global gene expression level, only TBX3<sup>-/-</sup> iPSCs, but not ESCs, display greater enrichment of the PluriNet signature (data not shown).

To test the differentiation capacity of TBX3<sup>-/-</sup> ESCs in vitro, we removed LIF/2i in a serum-based medium to allow spontaneous differentiation. TBX3<sup>-/-</sup> ESCs displayed a delay in losing typical ESC morphology compared to controls (Figures 4F and S5). Of note, TBX3<sup>-/-</sup> ESCs showed higher mRNA baseline levels of *Oct4*, *Sox2*, and *Nanog* (Figures 4G and 4H). Downregulation of pluripotency markers assimilated rapidly, whereas upregulation of the endodermal differentiation markers was limited in TBX3-null cells. In contrast, *brachyury* (*T*) upregulation occurred earlier in TBX3<sup>-/-</sup> cells in line with a recent study (Waghray et al., 2015; Figures 4H and 4I). This supports previous observations showing that TBX3 fine-tunes early cell fate choices in a dose-dependent manner (Kartikasari et al., 2013; Lu et al., 2011; Weidgang et al., 2013).

### Loss of *Tbx3* Leads to Complex Compensational Processes

Previously, a simplified pluripotency circuitry was described (Dunn et al., 2014). We combined this network with TBX3-ChIP-sequencing data (Han et al., 2010a) and our gene expression data of wild-type versus TBX3<sup>-/-</sup> ESCs cultured under LIF/2i conditions to obtain a more global view on the molecular changes upon TBX3 removal. Figure 5A shows a network in which the inner circle describes core factors of pluripotency, whereas the outer circle

depicts TBX3-bound genes that are differentially regulated in TBX3<sup>-/-</sup> ESCs. Most pluripotency markers in the inner circle did not show significant changes in their gene expression, although *Klf4/5*, *Esrrb*, *Tfcp2l1*, and *NrOb1* were slightly downregulated in TBX3<sup>-/-</sup> ESCs compared to controls (yellow/red color in Figure 5A) and qPCR indicated upregulation of *Oct4*, *Sox2*, and *Nanog* (Figures 4G and 4H). TBX3 is a transcriptional repressor (Bakker et al., 2008). We hypothesize that loss of TBX3 may lead to an upregulation of specific genes impacting on pluripotency that are usually repressed by TBX3. TBX3-bound genes in the outer circle showed that *Dppa3*, *Fzd2*, *Abcc2*, *Alk*, and *Dnmt3a* transcripts were significantly increased in TBX3<sup>-/-</sup> ESCs (Figure 5A). To narrow down this list, we compared the upregulated genes in TBX3<sup>-/-</sup> ESCs with the TBX3 target genes identified by a *Tbx3* knockdown experiment (Han et al., 2010a; Nishiyama et al., 2013), resulting in an overlap of 20 candidate genes (Figures 5B and 5C). The sole overlapping candidate between this approach and our network was *Dppa3/Stella*, a gene described to impact on pluripotency and germ cell development (Hayashi et al., 2008; Payer et al., 2006; Waghray et al., 2015; Xu et al., 2015). Our microarray data and single-cell qPCR confirmed the reciprocal relationship between *Tbx3* and *Dppa3* (Figures 5D, 5E, and 5G). Additionally, the DPPA3 promoter is occupied by TBX3 and possesses bivalent modifications as expected for genes regulating pluripotency (Figure 5F). Unexpectedly, the knockdown of *Dppa3* in TBX3<sup>-/-</sup> iPSCs did not impact on pluripotency as shown by colony formation assays and qPCR (Figures 5G–5I). We conclude that compensational mechanisms allow a TBX3<sup>-/-</sup> state independent of DPPA3 and most likely involve a complex compensational network, not only involving direct (as suggested by Figure 5A) but also indirect TBX3 target genes. Still, it appears rather antithetic that downregulation of TBX3 inversely correlates with developmental potential, whereas complete loss of TBX3 leads to overcompensation and a reduced propensity to differentiate. To address this point, we looked for overlap among

(B) Quantification of BrdU incorporation summarized from three TBX3<sup>ven/ven</sup> and a TBX3<sup>+/+</sup> ESC line. n = 3 (three individual clones). DAPI-based cell-cycle analysis revealed no difference between TBX3<sup>ven/ven</sup> and TBX3<sup>+/+</sup> ESCs (data not shown).

(C) Quantified AP+ colonies after removing individual LIF/2i components. N2B27 backbone medium. n = 3, for two independent clones with duplicate technical replicates.

(D) Co-culture strategy to compare self-renewal capacity of TBX3<sup>+/+</sup> and TBX3<sup>ven/ven</sup> mESC under LIF/2i. Analysis at start (P0) and end of experiment (P3) for venus expression via FACS is shown. n = 3, for two independent clones with duplicate technical replicates.

(E) Quantification of cell populations from (D) after three passages.

(F) Phase images of TBX3<sup>ven/ven</sup> and TBX3<sup>+/+</sup> mESC at 0 hr, 24 hr, 48 hr, and 72 hr after withdrawal of LIF and 2i. Delayed differentiation of TBX3<sup>ven/ven</sup> as evident by preserved ESC morphology. The scale bars represent 20 μm.

(G–I) mRNA levels of pluripotency markers (*Oct3/4*, *Sox2*, and *Nanog*), early endodermal markers (*Foxa2*, *Eomes*, and *Hnf4a*), *T* (*brachyury*) mesodermal, and *Pax6* as ectodermal marker in TBX3<sup>+/+</sup> and TBX3<sup>ven/ven</sup> mESC at respective time points of LIF/2i withdrawal. Two clones per genotype are shown.

Two independent experiments performed with triplicate technical replicates are shown. See also Figure S5.

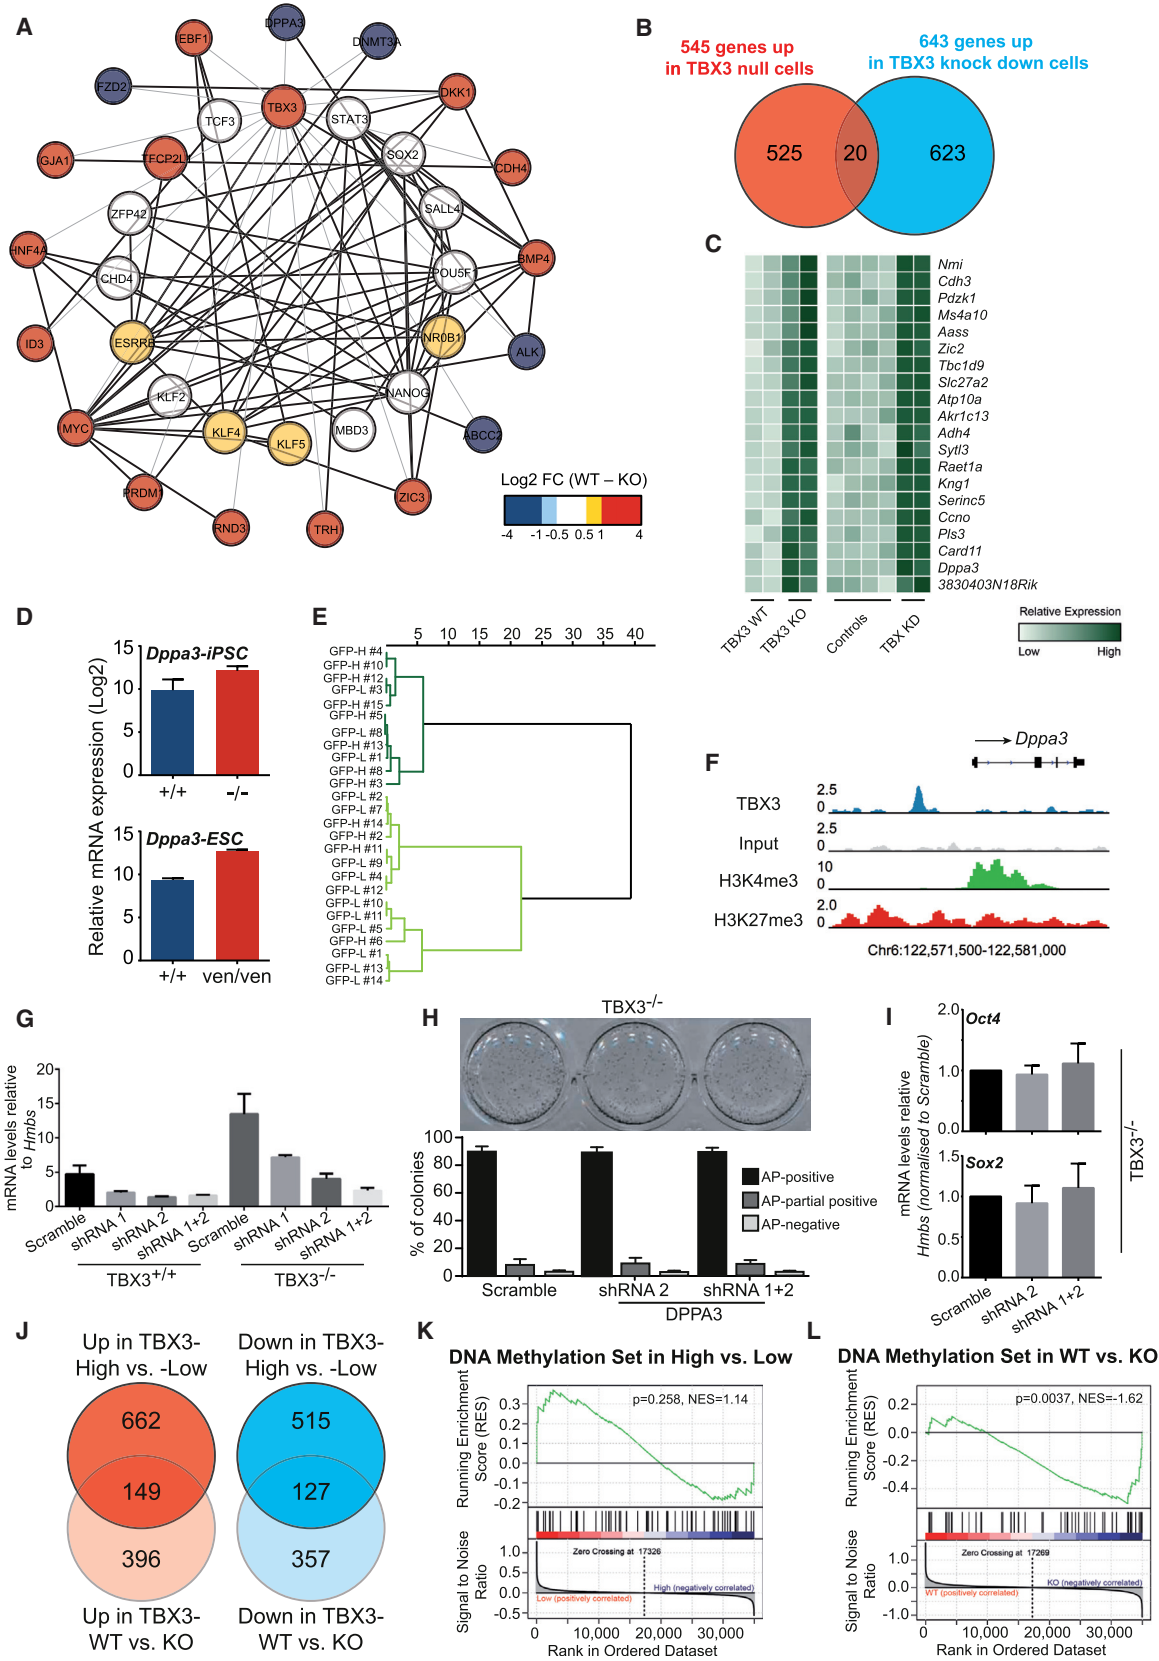

(legend on next page)



the differentially regulated genes in TBX3-low and -high and TBX3<sup>-/-</sup> and wild-type ESCs. Due to the developmental differences of these cell states, only a limited number of genes were commonly regulated (Figure 5J; Tables S5, S6, S7, and S8). Interestingly, a gene set associated with “DNA methylation” was enriched only in TBX3<sup>-/-</sup> cells and not in TBX3-low cells, indicating global epigenetic differences, particularly in TBX3<sup>-/-</sup> cells (Figures 5K and 5L).

## DISCUSSION

A series of studies has reported that TBX3 was indispensable for maintenance of pluripotency. In line, TBX3 gain of function facilitated induction of pluripotency (Han et al., 2010a; Ivanova et al., 2006; Lee et al., 2012; Lu et al., 2011; Nishiyama et al., 2013) but interestingly also lineage commitment (Kartikasari et al., 2013; Lu et al., 2011; Weidgang et al., 2013). In line with a recent study (Waghay et al., 2015), we provide clear evidence that TBX3 is absolutely dispensable for both maintenance and induction of pluripotency. Additionally, we show that its removal alters pluripotency exit. In a wild-type context, TBX3 is heterogeneously expressed in the developing embryo in vivo but also in ESCs in vitro and various TBX3 expression levels correlate with distinct developmental potential.

Heterogeneous expression of pluripotency factors has been described and studied in detail for Nanog when cultured under LIF/FCS conditions. Single-cell resolution

confirmed this observation and correlates a TF-low state with a more committed EPI-like state (Murayama et al., 2015; Papatsenko et al., 2015; Sugimoto et al., 2015). The advent of serum-free LIF/2i cultures, which virtually erases TF heterogeneity, questions this observation as a relic of outdated culture conditions, whereas others envision it as a stochastic advantage mimicking the dynamic fluctuations in the developing embryo (Martello and Smith, 2014; Torres-Padilla and Chambers, 2014). Though heterogeneity in vivo is established as early as in the four- to eight-cell stage (e.g., NANOG), reciprocal lineage patterning between NANOG/CDX2 occurs later (Dietrich and Hiiragi, 2007). These lineage segregation events have been defined into at least three rapid but sequential events in vivo (Schrode et al., 2013), whereas mESCs cultured under LIF/2i conditions are arguably more similar to the EPI cells found in diapause embryos (Abranches et al., 2014; Murayama et al., 2015; Papatsenko et al., 2015; Sugimoto et al., 2015). Therefore, heterogeneity found in mESCs cultured in LIF/FCS might be a closer reflection of the heterogeneity found in vivo in pre-implantation blastocysts. Notably, neither culture regime precisely recapitulates the in vivo situation (Macfarlan et al., 2012). In turn, most likely each cell culture system presents distinct advantages to study various facets of pluripotency and lineage commitment.

We complemented such in vitro observations with in vivo assays that allow to rigorously test the pluripotent potential of defined cell populations. In the context of wild-type mESCs, expression of *Tbx3* inversely correlates

### Figure 5. TBX3 Depletion Leads to Complex Compensational Processes

(A) Molecular circuitry of pluripotency markers (inner layer) and TBX3 target genes (outer layer) generated by the STRING database. The color of a node reflects the change in gene expression level between wild-type (WT) and TBX3-null (KO) ESCs. Black edge shows an evident interaction (confidence score > 0.7) between two connected genes from the STRING database. The gray edge connects TBX3 with its target genes identified by ChIP-seq data (GSE19219; Han et al., 2010a).

(B) Venn diagram of upregulated genes in TBX3-null ESCs and *Tbx3* knockdown ESCs (GSE26520), compared to respective wild-type controls, shows 20 candidate genes.

(C) Heatmap of gene expression level of these candidate genes. Light green, below median expression; dark green, above median.

(D) The expression level of *Dppa3* in TBX3<sup>+/+</sup> and TBX3<sup>-/-</sup> iPSCs, wild-type (+/+), and TBX3-null (ven/ven) ESCs.

(E) Clustering of single-cell *Dppa3* expression (n = 26) suggests the reciprocal expression between *Tbx3* and *Dppa3* (hypergeometric test; p = 0.023). Dark green, group of low *Dppa3* expression; light green, group of high *Dppa3* expression. TBX3-low-sorted single cell is shown (GFP-L no. X). TBX3-high-sorted single cell is shown (GFP-H no. X).

(F) TBX3 occupancy (GSE19219) and H3K4me3/H3K27me3 bivalent modifications (GSE31039) of DPPA3 promoter region in ESCs.

(G) *Dppa3* expression in WT or TBX3<sup>-/-</sup> iPSCs upon transduction with scramble control virus or various combinations of different shRNAs targeting *Dppa3*. Two independent experiments performed with triplicate technical replicates are shown.

(H) Colony formation of TBX3<sup>-/-</sup> iPSC lines with shRNAs against *Dppa3* upon clonal density seeding. Top, representative AP-stained plates; bottom, quantification of three independent experiments performed with triplicate technical replicates. Black bar, AP positive; grey bar, partially AP positive; light gray bar, AP negative.

(I) qPCR of pluripotency markers in *Dppa3* knockdown and scramble control TBX3<sup>-/-</sup> iPSC lines (three independent experiments performed with duplicate technical replicates).

(J) Comparisons of differentially regulated genes between TBX3-high and -low ESC and between TBX3 WT (+/+) and TBX3-null (ven/ven) ESCs.

(K and L) The GO terms of DNA methylation (G00006306) show no bias toward TBX3-high or -low ESCs (K) but were significantly enriched in TBX3-null ESCs (L).

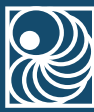

with the capacity to form chimeric embryos and thereby supports the hypothesis that TBX3-low cells resemble committed EPI-like cells (Papatsenko et al., 2015). Moreover, we show that, even after cross-platform adjustment, the transcriptome of our TBX3-high cells converges on that of the ICM, whereas TBX3-low cells better resemble the E5.5/6.5 EPI.

Our data identify dynamic fluctuations in TBX3-expression levels to be linked with developmental potency of PSCs and hint that, within the heterogeneous TBX3 expression found in the late blastocyst, TBX3-high correlates with a Nanog-low state and thus PE cell fate specification (Niwa et al., 2009; Xenopoulos et al., 2015). This was independently confirmed by re-analyzing RNA sequencing data of single embryonic cells in pre-implantation embryos. Interestingly, a recent report described occasional transitions in NANOG expression in vivo from the PE back to the EPI (Xenopoulos et al., 2015). It would be of interest in the future to perform live-time imaging studies to track the fate of various TBX3 states to their progeny in pre- and postimplantation embryonic stages.

We were able to generate TBX3-null PSCs showing all hallmarks of pluripotency. This strongly contradicts several previous reports (Han et al., 2010a; Ivanova et al., 2006; Lee et al., 2012; Lu et al., 2011; Nishiyama et al., 2013) but supports a very recent study (Waghray et al., 2015). Additionally, it seems to be in conflict with our findings that TBX3-low cells represent a differentiation-poised late EPI state. A series of reports revealed strong variability between different EPI lines with various degrees of lineage bias and developmental potential (Bernemann et al., 2011; Han et al., 2010b; Murayama et al., 2015; Sugimoto et al., 2015). Nevertheless, germline transmission or even the generation of all-PSC mice upon 4n embryo aggregation has never been reported for EpiSCs (Bernemann et al., 2011; Han et al., 2010b). Intriguingly, recent studies implicated that the pluripotency circuitry can be perturbed in both directions, either toward differentiation or to a pluripotency arrested state with a hampered differentiation capacity as shown for the reduction of OCT4 expression (Karwacki-Neisius et al., 2013; Radzishanskaya et al., 2013). We observe similar behaviors in TBX3-null cells. These cells not only keep their undifferentiated state longer than wild-type counterparts upon LIF/2i removal but also outperform wild-type cells in a competition assay. They also successfully formed all-PSC-derived mouse embryos in a 4n assay displaying the reported TBX3-null phenotypes (Davenport et al., 2003; Frank et al., 2013).

Previous studies identified TBX3 as an important driver and enhancer for iPSC formation (Han et al., 2010a). In our hands, reprogramming of TBX3-null MEFs occurred with similar efficiencies and kinetics compared to wild-type MEFs. Expanded clones retain the full ground state

pluripotency. Interestingly, normal germline development occurred in TBX3-null mice, although it seems to be essential for the maintenance of SSCs after birth based on our observation using IVF with sperm from a TBX3-null iPSC chimeric mouse. The TBX2 subfamily (TBX2, 3, 4, and 5) has been previously implicated in the development of the reproductive system (Douglas et al., 2012), and overexpressing TBX3 with the Yamanaka factors generated iPSCs with higher capacity for germline contribution (Han et al., 2010a). TBX3 is only expressed in genital ducts, and deletion of TBX4, a close family member of TBX3 (Ber-tolessi et al., 2015), led to a reduced amount of primordial germ cells but with subsequent normal fertility (Douglas et al., 2013). Further studies need to clarify the precise role of TBX3 for germ cell development, particularly in light of the intimate connection between DPPA3/STELLA and TBX3 (Douglas et al., 2013; Waghray et al., 2015). Thus, TBX3 supports but is not absolutely required to maintain and install pluripotency and germ cell development, probably due to an alternate pluripotency network. Transcriptome analysis and downstream bioinformatical analysis of TBX3-null PSCs helped to identify putative compensators revealing DPPA3 as the most promising candidate, in line with a recent study (Waghray et al., 2015). Although we confirmed an intimate connection between TBX3 and DPPA3, self-renewal of TBX3-null cells remained stable upon depletion of DPPA3. Most likely several lines of compensation may allow ongoing self-renewal in TBX3-null cells. In fact, Waghray et al. (2015) also observed just partial compensation by DPPA3 in the TBX3-null state. Most likely, differences in the genetic background or distinct cell culture conditions further impact the observed differences between our study and Waghray et al. Nevertheless, the intimate connection between TBX3 and DPPA3 remains and needs to be explored in detail in future studies.

Our observations of an enriched DNA-methylation signature only in TBX3-null and not in the TBX3-low cells indicate additional epigenetic mechanisms that may be implicated and warrant further investigation (Figure 5L). Notably, DPPA3 and DNMT3a were found to be associated during cellular reprogramming and DNA methyltransferases are critical for both genome integrity and differentiation capacity of mESCs (Baubec et al., 2015; Xu et al., 2015). Moreover, OCT4 haploinsufficiency stabilizes the pluripotency circuitry not only at the transcriptional level but also at the epigenetic level via higher occupancy of key regulatory elements supporting pluripotency (Karwacki-Neisius et al., 2013; Radzishanskaya et al., 2013). Taken together, we have deciphered further aspects of TBX3 activity within the pluripotency circuitry and identify variable pluripotency states, which underpin the dual role of pluripotency for both indefinite self-renewal and cell lineage specification.

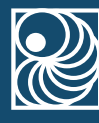

## EXPERIMENTAL PROCEDURES

Full methods accompany this paper.

### Ethics Statement

All animal experiments were performed in compliance with the guidelines for the welfare of experimental animals issued by the Federal Government of Germany, the NIH, and the Max Planck Society. The experiments in this study were approved by the review board of the Land Baden-Wuerttemberg and the ethics committee of Ulm University.

### Reprogramming and PSC Culture

MEFs were isolated and reprogrammed according to standard protocols from TBX3<sup>+/-</sup> and TBX3<sup>-/-</sup> mice (Kleger et al., 2012).

### Isolation of mESCs from Blastocysts

TBX3-BAC-EGFP mESCs and TBX3-KI-Venus mESCs were derived using previously reported methods by breeding TBX3-BAC-EGFP and TBX3-KI-Venus heterozygous mice, respectively (Bryja et al., 2006).

### Western Blot

Western blotting was performed according to standard procedures (Linta et al., 2012). Whole-cell extracts (50–100 µg) prepared using RIPA lysis buffer containing 50 mM Tris HCl (pH 8.0), 150 mM NaCl, 0.05% Na-Deoxycholat, 1% NP40, 0.01% SDS, and 1 mM PMSF supplemented with Complete Protease Inhibitor Cocktail Tablets (Roche) were subjected to SDS-PAGE.

### IHC

IHC was performed as described in Russell et al. (2015) and Stockmann et al. (2013). Cells at different time points of differentiation were fixed using 4% paraformaldehyde (PFA). Nuclei were stained with DAPI. Images were captured using an upright fluorescence Zeiss Axioimager Z1 microscope and analyzed using Axiovision software (Zeiss).

### Microarray Data Analysis

The DNA microarray data were pre-processed and normalized by the limma package (Wettenhall and Smyth, 2004). The differentially expressed genes of a pairwise comparison were detected using limma t test with criteria of fold change >2 and p value < 0.05. The p value was further adjusted by the procedure of Benjamini and Hochberg (Klipper-Aurbach et al., 1995).

### ACCESSION NUMBERS

The accession number for the microarray data reported in this paper is GEO: GSE73862.

### SUPPLEMENTAL INFORMATION

Supplemental Information includes Supplemental Experimental Procedures, five figures, and eight tables and can be found with this article online at <http://dx.doi.org/10.1016/j.stemcr.2015.11.003>.

## AUTHOR CONTRIBUTIONS

Study concept and design, A.K., A.I., and S.L.; acquisition of the main part of experimental data, R.R., M.I., G.W., and Q.L.; experimental support, L.L., M.H., M.K., S.R., W.B., and O.S.; microarray analysis, Q.L., M.Z., and A.K.; 2n/4n embryo aggregation, G.W. and H.S.; TBX3<sup>-/-</sup> mice and MEF cultures, P.K.P. and A.M.; single-cell analysis, S.R. and M.K.; analysis and interpretation of data, A.K., A.I., R.R., Q.L., and S.L.; drafting of the manuscript, A.K., A.I., and S.L.; critical revision of the manuscript for important intellectual content, R.R., Q.L., G.W., A.L., S.R., K.A., A.M., M.Z., A.I., S.L., and A.K.; study supervision: A.I., A.K., and S.L.

## ACKNOWLEDGMENTS

The authors thank Ralf Köhntop and Sabine Conrad for excellent technical assistance and V. Christoffels for providing TBX3<sup>venus/venus</sup> and TBX3-BAC-EGFP mice. This study was funded by the Deutsche Forschungsgemeinschaft (DFG, K.L. 2544/1-1, S.L. BO1718/4-1, M.Z. ZE432/5-2), Forschungskern SyStaR to A.K., BIU (Böhringer Ingelheim Ulm to A.K.), *Fortüne* (Faculty of Medicine Tübingen to L.L.), and Else-Kröner-Fresenius-Stiftung (2011\_A200; to A.K. and S.L.). A.K. is indebted to the Baden-Württemberg Stiftung for the financial support of this research project by the Eliteprogramme for Postdocs. A.K. is an Else-Kröner-Fresenius Memorial Fellow.

Received: March 11, 2015

Revised: November 6, 2015

Accepted: November 12, 2015

Published: December 8, 2015

## REFERENCES

- Abranches, E., Guedes, A.M., Moravec, M., Maamar, H., Svoboda, P., Raj, A., and Henrique, D. (2014). Stochastic NANOG fluctuations allow mouse embryonic stem cells to explore pluripotency. *Development* *141*, 2770–2779.
- Bakker, M.L., Boukens, B.J., Mommersteeg, M.T., Brons, J.F., Wakker, V., Moorman, A.F., and Christoffels, V.M. (2008). Transcription factor Tbx3 is required for the specification of the atrioventricular conduction system. *Circ. Res.* *102*, 1340–1349.
- Banito, A., Rashid, S.T., Acosta, J.C., Li, S., Pereira, C.F., Geti, I., Pinho, S., Silva, J.C., Azuara, V., Walsh, M., et al. (2009). Senescence impairs successful reprogramming to pluripotent stem cells. *Genes Dev.* *23*, 2134–2139.
- Baubec, T., Colombo, D.F., Wirbelauer, C., Schmidt, J., Burger, L., Krebs, A.R., Akalin, A., and Schübeler, D. (2015). Genomic profiling of DNA methyltransferases reveals a role for DNMT3B in genic methylation. *Nature* *520*, 243–247.
- Bernemann, C., Greber, B., Ko, K., Sternecker, J., Han, D.W., Araúzo-Bravo, M.J., and Schöler, H.R. (2011). Distinct developmental ground states of epiblast stem cell lines determine different pluripotency features. *Stem Cells* *29*, 1496–1503.
- Bertolessi, M., Linta, L., Seufferlein, T., Kleger, A., and Liebau, S. (2015). A fresh look on T-box factor action in early embryogenesis (T-box factors in early development). *Stem Cells Dev.* *24*, 1833–1851.



- Blakeley, P., Fogarty, N.M., Del Valle, I., Wamaitha, S.E., Hu, T.X., Elder, K., Snell, P., Christie, L., Robson, P., and Niakan, K.K. (2015). Defining the three cell lineages of the human blastocyst by single-cell RNA-seq. *Development* *142*, 3151–3165.
- Bryja, V., Bonilla, S., and Arenas, E. (2006). Derivation of mouse embryonic stem cells. *Nat. Protoc.* *1*, 2082–2087.
- Chambers, I., Silva, J., Colby, D., Nichols, J., Nijmeijer, B., Robertson, M., Vrana, J., Jones, K., Grotewold, L., and Smith, A. (2007). Nanog safeguards pluripotency and mediates germline development. *Nature* *450*, 1230–1234.
- Chen, Y., Blair, K., and Smith, A. (2013). Robust self-renewal of rat embryonic stem cells requires fine-tuning of glycogen synthase kinase-3 inhibition. *Stem Cell Reports* *1*, 209–217.
- Czechanski, A., Byers, C., Greenstein, I., Schrode, N., Donahue, L.R., Hadjantonakis, A.K., and Reinholdt, L.G. (2014). Derivation and characterization of mouse embryonic stem cells from permissive and nonpermissive strains. *Nat. Protoc.* *9*, 559–574.
- Davenport, T.G., Jerome-Majewska, L.A., and Papaioannou, V.E. (2003). Mammary gland, limb and yolk sac defects in mice lacking *Tbx3*, the gene mutated in human ulnar mammary syndrome. *Development* *130*, 2263–2273.
- Deng, Q., Ramsköld, D., Reinius, B., and Sandberg, R. (2014). Single-cell RNA-seq reveals dynamic, random monoallelic gene expression in mammalian cells. *Science* *343*, 193–196.
- Dietrich, J.E., and Hiiragi, T. (2007). Stochastic patterning in the mouse pre-implantation embryo. *Development* *134*, 4219–4231.
- Douglas, N.C., Heng, K., Sauer, M.V., and Papaioannou, V.E. (2012). Dynamic expression of *Tbx2* subfamily genes in development of the mouse reproductive system. *Dev. Dyn.* *241*, 365–375.
- Douglas, N.C., Arora, R., Chen, C.Y., Sauer, M.V., and Papaioannou, V.E. (2013). Investigating the role of *tbx4* in the female germline in mice. *Biol. Reprod.* *89*, 148.
- Dunn, S.J., Martello, G., Yordanov, B., Emmott, S., and Smith, A.G. (2014). Defining an essential transcription factor program for naïve pluripotency. *Science* *344*, 1156–1160.
- Faddah, D.A., Wang, H., Cheng, A.W., Katz, Y., Buganim, Y., and Jaenisch, R. (2013). Single-cell analysis reveals that expression of *nanog* is biallelic and equally variable as that of other pluripotency factors in mouse ESCs. *Cell Stem Cell* *13*, 23–29.
- Festuccia, N., Osorno, R., Halbritter, F., Karwacki-Neisius, V., Navarro, P., Colby, D., Wong, F., Yates, A., Tomlinson, S.R., and Chambers, I. (2012). *Esrrb* is a direct *Nanog* target gene that can substitute for *Nanog* function in pluripotent cells. *Cell Stem Cell* *11*, 477–490.
- Frank, D.U., Emechebe, U., Thomas, K.R., and Moon, A.M. (2013). Mouse *TBX3* mutants suggest novel molecular mechanisms for Ulnar-mammary syndrome. *PLoS ONE* *8*, e67841.
- Frum, T., Halbisen, M.A., Wang, C., Amiri, H., Robson, P., and Ralston, A. (2013). Oct4 cell-autonomously promotes primitive endoderm development in the mouse blastocyst. *Dev. Cell* *25*, 610–622.
- Gertsenstein, M., Nutter, L.M., Reid, T., Pereira, M., Stanford, W.L., Rossant, J., and Nagy, A. (2010). Efficient generation of germ line transmitting chimeras from C57BL/6N ES cells by aggregation with outbred host embryos. *PLoS ONE* *5*, e11260.
- Guo, G., Huss, M., Tong, G.Q., Wang, C., Li Sun, L., Clarke, N.D., and Robson, P. (2010). Resolution of cell fate decisions revealed by single-cell gene expression analysis from zygote to blastocyst. *Dev. Cell* *18*, 675–685.
- Han, J., Yuan, P., Yang, H., Zhang, J., Soh, B.S., Li, P., Lim, S.L., Cao, S., Tay, J., Orlov, Y.L., et al. (2010a). *Tbx3* improves the germ-line competency of induced pluripotent stem cells. *Nature* *463*, 1096–1100.
- Han, D.W., Tapia, N., Joo, J.Y., Greber, B., Araúzo-Bravo, M.J., Bernemann, C., Ko, K., Wu, G., Stehling, M., Do, J.T., and Schöler, H.R. (2010b). Epiblast stem cell subpopulations represent mouse embryos of distinct pregastrulation stages. *Cell* *143*, 617–627.
- Hayashi, K., Lopes, S.M., Tang, F., and Surani, M.A. (2008). Dynamic equilibrium and heterogeneity of mouse pluripotent stem cells with distinct functional and epigenetic states. *Cell Stem Cell* *3*, 391–401.
- Horsthuis, T., Buermans, H.P., Brons, J.F., Verkerk, A.O., Bakker, M.L., Wakker, V., Clout, D.E., Moorman, A.F., 't Hoen, P.A., and Christoffels, V.M. (2009). Gene expression profiling of the forming atrioventricular node using a novel *tbx3*-based node-specific transgenic reporter. *Circ. Res.* *105*, 61–69.
- Ivanova, N., Dobrin, R., Lu, R., Kotenko, I., Levorse, J., DeCoste, C., Schafer, X., Lun, Y., and Lemischka, I.R. (2006). Dissecting self-renewal in stem cells with RNA interference. *Nature* *442*, 533–538.
- Kalmar, T., Lim, C., Hayward, P., Muñoz-Descalzo, S., Nichols, J., Garcia-Ojalvo, J., and Martinez Arias, A. (2009). Regulated fluctuations in *nanog* expression mediate cell fate decisions in embryonic stem cells. *PLoS Biol.* *7*, e1000149.
- Kartikasari, A.E., Zhou, J.X., Kanji, M.S., Chan, D.N., Sinha, A., Grapin-Botton, A., Magnuson, M.A., Lowry, W.E., and Bhushan, A. (2013). The histone demethylase *Jmjd3* sequentially associates with the transcription factors *Tbx3* and *Eomes* to drive endoderm differentiation. *EMBO J.* *32*, 1393–1408.
- Karwacki-Neisius, V., Göke, J., Osorno, R., Halbritter, F., Ng, J.H., Weiße, A.Y., Wong, F.C., Gagliardi, A., Mullin, N.P., Festuccia, N., et al. (2013). Reduced *Oct4* expression directs a robust pluripotent state with distinct signaling activity and increased enhancer occupancy by *Oct4* and *Nanog*. *Cell Stem Cell* *12*, 531–545.
- Kleger, A., Mahaddakar, P.U., Katz, S.F., Lechel, A., Joo, J.Y., Loya, K., Lin, Q., Hartmann, D., Liebau, S., Kraus, J.M., et al. (2012). Increased reprogramming capacity of mouse liver progenitor cells, compared with differentiated liver cells, requires the BAF complex. *Gastroenterology* *142*, 907–917.
- Klipper-Aurbach, Y., Wasserman, M., Braunsiegel-Weintrob, N., Borstein, D., Peleg, S., Assa, S., Karp, M., Benjamini, Y., Hochberg, Y., and Laron, Z. (1995). Mathematical formulae for the prediction of the residual beta cell function during the first two years of disease in children and adolescents with insulin-dependent diabetes mellitus. *Med. Hypotheses* *45*, 486–490.
- Kumar, P.P., Emechebe, U., Smith, R., Franklin, S., Moore, B., Yandell, M., Lessnick, S.L., and Moon, A.M. (2014). Coordinated control of senescence by lncRNA and a novel T-box3 co-repressor complex. *eLife* *3*, e02805.
- Kunasegaran, K., Ho, V., Chang, T.H., De Silva, D., Bakker, M.L., Christoffels, V.M., and Pietersen, A.M. (2014). Transcriptional



- repressor Tbx3 is required for the hormone-sensing cell lineage in mammary epithelium. *PLoS ONE* 9, e110191.
- Kurek, D., Neagu, A., Tastemel, M., Tüysüz, N., Lehmann, J., van de Werken, H.J., Philipsen, S., van der Linden, R., Maas, A., van IJcken, W.F., et al. (2015). Endogenous WNT signals mediate BMP-induced and spontaneous differentiation of epiblast stem cells and human embryonic stem cells. *Stem Cell Reports* 4, 114–128.
- Lee, D.F., Su, J., Sevilla, A., Gingold, J., Schaniel, C., and Lemischka, I.R. (2012). Combining competition assays with genetic complementation strategies to dissect mouse embryonic stem cell self-renewal and pluripotency. *Nat. Protoc.* 7, 729–748.
- Leitch, H.G., Nichols, J., Humphreys, P., Mulas, C., Martello, G., Lee, C., Jones, K., Surani, M.A., and Smith, A. (2013). Rebuilding pluripotency from primordial germ cells. *Stem Cell Reports* 1, 66–78.
- Linta, L., Stockmann, M., Kleinhans, K.N., Böckers, A., Storch, A., Zaehres, H., Lin, Q., Barbi, G., Böckers, T.M., Kleger, A., and Liebau, S. (2012). Rat embryonic fibroblasts improve reprogramming of human keratinocytes into induced pluripotent stem cells. *Stem Cells Dev.* 21, 965–976.
- Lu, R., Yang, A., and Jin, Y. (2011). Dual functions of T-box 3 (Tbx3) in the control of self-renewal and extraembryonic endoderm differentiation in mouse embryonic stem cells. *J. Biol. Chem.* 286, 8425–8436.
- MacArthur, B.D., Sevilla, A., Lenz, M., Müller, F.J., Schuldt, B.M., Schuppert, A.A., Ridden, S.J., Stumpf, P.S., Fidalgo, M., Ma'ayan, A., et al. (2012). Nanog-dependent feedback loops regulate murine embryonic stem cell heterogeneity. *Nat. Cell Biol.* 14, 1139–1147.
- Macfarlan, T.S., Gifford, W.D., Driscoll, S., Lettieri, K., Rowe, H.M., Bonanomi, D., Firth, A., Singer, O., Trono, D., and Pfaff, S.L. (2012). Embryonic stem cell potency fluctuates with endogenous retrovirus activity. *Nature* 487, 57–63.
- Martello, G., and Smith, A. (2014). The nature of embryonic stem cells. *Annu. Rev. Cell Dev. Biol.* 30, 647–675.
- Miyazari, Y., and Torres-Padilla, M.E. (2012). Control of ground-state pluripotency by allelic regulation of Nanog. *Nature* 483, 470–473.
- Müller, F.J., Laurent, L.C., Kostka, D., Ulitsky, I., Williams, R., Lu, C., Park, I.H., Rao, M.S., Shamir, R., Schwartz, P.H., et al. (2008). Regulatory networks define phenotypic classes of human stem cell lines. *Nature* 455, 401–405.
- Murayama, H., Masaki, H., Sato, H., Hayama, T., Yamaguchi, T., and Nakauchi, H. (2015). Successful reprogramming of epiblast stem cells by blocking nuclear localization of  $\beta$ -catenin. *Stem Cell Reports* 4, 103–113.
- Nishiyama, A., Sharov, A.A., Piao, Y., Amano, M., Amano, T., Hoang, H.G., Binder, B.Y., Tapnio, R., Bassey, U., Malinou, J.N., et al. (2013). Systematic repression of transcription factors reveals limited patterns of gene expression changes in ES cells. *Sci. Rep.* 3, 1390.
- Niwa, H., Ogawa, K., Shimosato, D., and Adachi, K. (2009). A parallel circuit of LIF signalling pathways maintains pluripotency of mouse ES cells. *Nature* 460, 118–122.
- Nora, E.P., Lajoie, B.R., Schulz, E.G., Giorgetti, L., Okamoto, I., Servant, N., Piolot, T., van Berkum, N.L., Meisig, J., Sedat, J., et al. (2012). Spatial partitioning of the regulatory landscape of the X-inactivation centre. *Nature* 485, 381–385.
- Papatsenko, D., Darr, H., Kulakovskiy, I.V., Waghray, A., Makeev, V.J., MacArthur, B.D., and Lemischka, I.R. (2015). Single-cell analyses of ESCs reveal alternative pluripotent cell states and molecular mechanisms that control self-renewal. *Stem Cell Reports* 5, 207–220.
- Payer, B., Chuva de Sousa Lopes, S.M., Barton, S.C., Lee, C., Saitou, M., and Surani, M.A. (2006). Generation of stella-GFP transgenic mice: a novel tool to study germ cell development. *Genesis* 44, 75–83.
- Piras, V., Tomita, M., and Selvarajoo, K. (2014). Transcriptome-wide variability in single embryonic development cells. *Sci. Rep.* 4, 7137.
- Radzishchenskaya, A., Chia, G.L., dos Santos, R.L., Theunissen, T.W., Castro, L.F., Nichols, J., and Silva, J.C. (2013). A defined Oct4 level governs cell state transitions of pluripotency entry and differentiation into all embryonic lineages. *Nat. Cell Biol.* 15, 579–590.
- Russell, R., Perkhof, L., Liebau, S., Lin, Q., Lechel, A., Feld, F.M., Hessmann, E., Gaedcke, J., Güthle, M., Zenke, M., et al. (2015). Loss of ATM accelerates pancreatic cancer formation and epithelial-mesenchymal transition. *Nat. Commun.* 6, 7677.
- Schrode, N., Xenopoulos, P., Piliszek, A., Frankenberg, S., Plusa, B., and Hadjantonakis, A.K. (2013). Anatomy of a blastocyst: cell behaviors driving cell fate choice and morphogenesis in the early mouse embryo. *Genesis* 51, 219–233.
- Stadtfeld, M., Apostolou, E., Akutsu, H., Fukuda, A., Follett, P., Natesan, S., Kono, T., Shioda, T., and Hochedlinger, K. (2010). Aberrant silencing of imprinted genes on chromosome 12qF1 in mouse induced pluripotent stem cells. *Nature* 465, 175–181.
- Stockmann, M., Linta, L., Föhr, K.J., Boeckers, A., Ludolph, A.C., Kuh, G.F., Udvardi, P.T., Proepper, C., Storch, A., Kleger, A., et al. (2013). Developmental and functional nature of human iPSC derived motoneurons. *Stem Cell Rev.* 9, 475–492.
- Sugimoto, M., Kondo, M., Koga, Y., Shiura, H., Ikeda, R., Hirose, M., Ogura, A., Murakami, A., Yoshiki, A., Chuva de Sousa Lopes, S.M., and Abe, K. (2015). A simple and robust method for establishing homogeneous mouse epiblast stem cell lines by wnt inhibition. *Stem Cell Reports* 4, 744–757.
- Takahashi, K., and Yamanaka, S. (2006). Induction of pluripotent stem cells from mouse embryonic and adult fibroblast cultures by defined factors. *Cell* 126, 663–676.
- Teo, A.K., Arnold, S.J., Trotter, M.W., Brown, S., Ang, L.T., Chng, Z., Robertson, E.J., Dunn, N.R., and Vallier, L. (2011). Pluripotency factors regulate definitive endoderm specification through eomesodermin. *Genes Dev.* 25, 238–250.
- Torres-Padilla, M.E., and Chambers, I. (2014). Transcription factor heterogeneity in pluripotent stem cells: a stochastic advantage. *Development* 141, 2173–2181.
- Toyooka, Y., Shimosato, D., Murakami, K., Takahashi, K., and Niwa, H. (2008). Identification and characterization of subpopulations in undifferentiated ES cell culture. *Development* 135, 909–918.

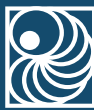

- Waghray, A., Saiz, N., Jayaprakash, A.D., Freire, A.G., Papatsenko, D., Pereira, C.F., Lee, D.F., Brosh, R., Chang, B., Darr, H., et al. (2015). *Tbx3* controls *Dppa3* levels and exit from pluripotency toward mesoderm. *Stem Cell Reports* 5, 97–110.
- Weidgang, C.E., Russell, R., Tata, P.R., Kühl, S.J., Illing, A., Müller, M., Lin, Q., Brunner, C., Boeckers, T.M., Bauer, K., et al. (2013). *TBX3* directs cell-fate decision toward mesendoderm. *Stem Cell Reports* 1, 248–265.
- Wettenhall, J.M., and Smyth, G.K. (2004). *limmaGUI*: a graphical user interface for linear modeling of microarray data. *Bioinformatics* 20, 3705–3706.
- Wray, J., Kalkan, T., and Smith, A.G. (2010). The ground state of pluripotency. *Biochem. Soc. Trans.* 38, 1027–1032.
- Xenopoulos, P., Kang, M., Puliafito, A., Di Talia, S., and Hadjantonakis, A.K. (2015). Heterogeneities in *Nanog* expression drive stable commitment to pluripotency in the mouse blastocyst. *Cell Rep.* 10, 1508–1520.
- Xu, X., Smorag, L., Nakamura, T., Kimura, T., Dressel, R., Fitzner, A., Tan, X., Linke, M., Zechner, U., Engel, W., and Pantakani, D.V. (2015). *Dppa3* expression is critical for generation of fully reprogrammed iPS cells and maintenance of *Dlk1-Dio3* imprinting. *Nat. Commun.* 6, 6008.



**Stem Cell Reports**

**Supplemental Information**

## **A Dynamic Role of TBX3 in the Pluripotency Circuitry**

**Ronan Russell, Marcus Ilg, Qiong Lin, Guangming Wu, André Lechel, Wendy Bergmann, Tim Eiseler, Leonhard Linta, Pavan Kumar P., Moritz Klingenstein, Kenjiro Adachi, Meike Hohwieler, Olena Sakk, Stefanie Raab, Anne Moon, Martin Zenke, Thomas Seufferlein, Hans R. Schöler, Anett Illing, Stefan Liebau, and Alexander Kleger**

## Supplemental Figure Legends

**Supplementary Figure 1. Expression heterogeneity of *Tbx3* upon ESC differentiation.** Related to Main Figure 1. (A-D) Violin plots of expression levels in individual cells for *Nanog*, *Pou5f1* and *Tbx3* at the 8-cell, 16-cell, early blastocyst and late blastocyst stage, respectively. (E-G) Individual cells were classified into (putative) ICM or TE group according to expression of predefined gene set (Guo et al., 2010) at 16-cell, early blastocyst and late blastocyst stage, respectively. The expressions of *Tbx3* were also included and highlighted in the heat maps. Blue, expression lower than median; white, median expression; red, expression higher than median. (H-J) The boxplot of expressions in ICM or TE biased cells for *Pou5f1* and *Tbx3* at three different stages, respectively. (K). Genes in predefined gene set (Guo et al., 2010) were ranked according to their correlation with *Tbx3* at late blastocyst stage, from most positive correlated (red) to most negatively correlated (blue).

**Supplemental Figure 2. *Tbx3* expression in wild type PSCs and differentially regulated genes between indicated groups.** Related to Main Figure 1. (A) Immunostaining for the TBX3 protein wild type mESCs cultured under the indicated conditions. Note heterogeneous TBX3 expression under LIF/feeder conditions. n=3. Scale bars 20 $\mu$ m. (B) Endogenous *Tbx3* mRNA levels relative to *Hmbs* in single sorted TBX3<sup>GFP</sup> high or low ESCs. (C) Venn diagram showing numbers of differentially regulated genes comparing TBX3<sup>GFP</sup> high or low ESCs and 2i-treated ESCs (J1\_2i taken from GSE58735). (D) The expression profiles of selected ESC, differentiation and epiblast stem cell-specific genes (Kurek et al., 2015) in 2i-treated, TBX3<sup>GFP</sup> high or low ESCs are represented in a heatmap format.

**Supplemental Figure 3. TBX3 null PSC characterization.** Related to Main Figure 3. (A) and (B) Representative fluorescent images for SSEA1 of TBX3<sup>+/+</sup> and TBX3<sup>+/-</sup> iPSCs (A) and *de novo* derived TBX3<sup>+/+</sup> and TBX3<sup>ven/ven</sup> mESCs (B) under 2i/LIF conditions. Scale bars, 20  $\mu$ m. (C) Representative phase contrast and GFP fluorescent images of *de novo* derived mESCs with the indicated genotypes cultured under 2i/LIF conditions. Scale bars, 20  $\mu$ m. (D) Representative genotyping of mESC clones derived from blastocysts of heterozygous mating strategies as outlined in Figure 3H. (E) FACS profiles of the indicated TBX3-genotypes in *de novo* derived ESCs. n=3. Scale bars 20 $\mu$ m.

**Supplemental Figure 4. Assessment of chimeric contribution of TBX3 null PSC.** Related to Main Figure 3. (A) Tetraploid (4n, Top panel) and diploid (2n, Bottom panel) embryo aggregation using LV-EGFP TBX3<sup>ven/ven</sup> ESCs. E2.5 Zonae pellucidae-free embryos were aggregated in pair (4n) or individually (2n) with *FAH*<sup>-/-</sup>-iPS cells. The chimeric embryos developed to blastocyst stage in culture overnight (E3.5) and were then transferred into the uterus of pseudopregnant mice. E9 fetuses were collected and

examined for green fluorescence. Scale bars = 50  $\mu\text{m}$ . **(B)** Arrested E11.5 fetuses were recovered after tetraploid embryo complementation with LV-tdTomato TBX3<sup>-/-</sup> iPSCs. **(C)** To assess germline development in chimeric embryos, the zonae pellucidae of the 8-cell embryos (2n, E2.5, top panel) were removed by acidified Tyrode's solution and aggregated with OCT4-GFP/LVtdTomato TBX3<sup>-/-</sup> iPSCs. The chimeric embryos developed to blastocyst stage in culture overnight (E3.5, bottom panel) and then were transferred into the uterus of pseudopregnant mice. Scale bars 20 $\mu\text{m}$  (A; left and middle panel), 1mm (A; right panel), 100 $\mu\text{m}$  (C).

**Supplemental Figure 5. Investigation of differentiation of Tbx3 null PSCs.** Related to Main Figure 4. Phase contrast view of TBX3<sup>ven/ven</sup> and TBX3<sup>+/+</sup> mESC (second clone per genotype, n=2, see also Fig. **4F**) at 0 h, 24 h, 48 h and 72 h after withdrawal of LIF and 2i to induce spontaneous differentiation. Note the delayed differentiation of TBX3<sup>ven/ven</sup>.

### Supplemental Table Legends

**Supplemental Table 1.** Information on the used qPCR and genotyping primers in the study.

**Supplemental Table 2.** Differentially regulated genes between TBX3<sup>GFP</sup>-high and -low cells referred to 2i-treated ESCs. J1\_2i taken from GSE58735.

**Supplemental Table 3.** Differentially regulated genes between TBX3<sup>GFP</sup>-high and 2i treated ESCs. J1\_2i Taken from GSE58735.

**Supplemental Table 4.** Differentially regulated genes between TBX3<sup>GFP</sup>-low and 2i-treated ESCs. J1\_2i Taken from GSE58735.

**Supplemental Table 5.** Upregulated genes between TBX3 null ESCs and wildtype ESCs cultivated under 2i/LIF conditions.

**Supplemental Table 6.** Downregulated genes between TBX3 null ESCs and wildtype ESCs cultivated under 2i/LIF conditions.

**Supplemental Table 7.** Upregulated genes between TBX3<sup>GFP</sup>-high and -low ESCs cultivated under 2i/LIF conditions.

**Supplemental Table 8.** Downregulated genes between TBX3<sup>GFP</sup>-high and -low ESCs cultivated under 2i/LIF conditions.

## **Supplemental Experimental Procedures**

### **Reprogramming of Mouse Embryonic Fibroblasts**

Mouse embryonic fibroblasts (MEFs) were isolated according to standard protocols from TBX3<sup>+/-</sup> and TBX3<sup>-/-</sup> mice. Reprogramming virus was generated according to standard protocols as described previously (Illing et al., 2013; Liebau et al., 2013; Liebau et al., 2014). TBX3<sup>-/-</sup> MEFs (6well-plate) were seeded one day before infection with virus. Next day, 5  $\mu$ l per well of a 6 well-plate of 100 x concentrated virus (=1.2 x 10<sup>6</sup> proviral hOSK (Warlich et al., 2011) copies/ $\mu$ l) were added to the cells as a master mix. After 8 h of incubation at 37 °C, medium was changed to ES-Feeder medium and refreshed every day. At day 7, medium was changed to ESC culture conditions and changed every day. ESC culture conditions have been described previously (Kleger et al., 2012; Kleger et al., 2010; Muller et al., 2015), but for reprogramming instead of fetal calf serum (FCS), knock out serum replacement (KOSR) (Life Technologies, Germany) was used. On day 12, cultures were fixed and stained for alkaline phosphatase (AP)-expression according to standard protocols. Several independent iPSC clones derived from TBX3<sup>-/-</sup> MEFs were randomly picked based on typical ESC like morphology at day 13 of reprogramming. After expansion of individual clones, pluripotency analysis was carried out at early passage (1-5). All analysed clones were stained positive for pluripotency markers.

### **Isolation of Mouse Embryonic Stem Cells from blastocysts**

TBX3-EGFP mESCs and TBX3-KI-Venus mESCs were derived using previously reported methods by breeding TBX3-BacEGFP and TBX3-KI-venus heterozygous mice respectively (Bryja et al., 2006; Czechanski et al.). Briefly, the uterine horns of E3.5 pregnant females were removed, transferred into pre-warmed M16 medium (Sigma) and the embryos were flushed out of the uterine horn under a dissection microscope. The blastocysts were collected and individually transferred to one well of a 12 well-plate containing inactivated MEFs in SR-ES Medium. Medium was replaced every second day. Seven days later, expanded blastocysts were subject to 0.25 % Trypsin/EDTA for 15 s to ease removal from surrounding MEF, picked using a 10  $\mu$ l pipette, and individually transferred to 2.5 % Trypsin containing wells in a 96 well-plate. The picked blastocysts were dissociated in the well by pipetting up and down and subsequently transferred to individual wells of a 12 well-plate containing mitotically inactivated MEFs in ES-Feeder medium with daily medium changes. Once colonies were of sufficient size, cells were stocked and further expanded on inactive MEFs or transferred to feeder-free ES cell culture conditions.

### ***In Vitro* Fertilization**

Sperm preparation: The caudae epididymis were removed from 2 months-old OCT4-GFP/LVtdTomato iPSC chimera mouse and placed into 1-ml drops of mKSOM supplemented with 4 mM glucose and 0.4% (w/v) BSA (Sigma A9647) under oil in sperm dispersion dishes (referred to as modified-KSOM, mKSOM) (Kito and Ohta, 2005). Incisions were made in the cauda epididymis to allow spermatozoa to swim out. After 10 min of incubation at 37°C, tissue fragments were discarded. Fifty microliters of sperm suspension was added to 450- $\mu$ l drops of mKSOM and capacitation was allowed to proceed for 45–60 min at 37°C in the incubator. After capacitation, oocyte-cumulus complexes were transferred to the 500- $\mu$ l fertilization droplets.

Oocyte collection: Superovulated females were killed 14–16 h post-hCG administration, and the entire oviduct was dissected out and kept in 500  $\mu$ l drops of M2 medium at 37°C. The ampullae were opened by tearing with a forceps and cumulus-oocyte masses were released and transferred into fertilization droplet.

Fertilization *in vitro* fertilization (IVF) was carried out in 500- $\mu$ l droplets of mKSOM. Incubation was allowed to proceed for 4 h at 37°C in a 5% CO<sub>2</sub>. Then inseminated oocytes were washed and incubated in 50- $\mu$ l drops of mKSOM for 4 days and checked for GFP/ttdTomato expression.

### **Teratoma formation and histological analysis.**

TBX3<sup>+/-</sup> and TBX3<sup>-/-</sup> iPSCs were cultured under 2i/LIF conditions and subsequently harvested for injection. 1 x 10<sup>6</sup> cells were subcutaneously injected into the dorsal flank of male NMRI mice. Three weeks later, tumours were surgically dissected from the mice, fixed in 4 % formaldehyde and embedded in paraffin. Sections were subsequently stained with haematoxylin and eosin and subjected to histological examination.

### **Cell Culture**

Mouse embryonic fibroblast (MEF) feeder cells were cultured in DMEM supplemented with 10%, FCS (Sigma Aldrich), 1% Penicillin/Streptomycin (Sigma Aldrich), 2mM Glutamine (Sigma Aldrich), 1% Non-Essential Amino Acids (Sigma Aldrich), 1mM Sodium Pyruvate (Sigma Aldrich), 1%  $\beta$ -Mercaptoethanol (Merck Millipore) and 0.05mg/ml Vitamin C (Sigma Aldrich) in humidified atmosphere containing 5% CO<sub>2</sub> at 37° C. mESCs and miPSCs were cultured either in feeder-dependent conditions (LIF/feeder) with Knockout-DMEM (KO-DMEM; Life-Technologies), 15% FCS (Sigma, ESC-qualified), 1% Penicillin/Streptomycin, 1% Glutamine (Sigma Aldrich), 1% NEAA (Sigma Aldrich), 1% Sodium Pyruvate (Sigma Aldrich), 1%  $\beta$ -Mercaptoethanol (Merck Millipore) and 240 U/ml leukaemia inhibitory factor (LIF; Cell guidance systems) or feeder-free (2i/KOSR) with KO-DMEM, 20% KOSR (Knockout Serum

Replacement, Life Technologies), 1% Penicillin/Streptomycin, 1% Glutamine (Sigma Aldrich), 1% NEAA (Sigma Aldrich), 1% Sodium Pyruvate (Sigma Aldrich), 1%  $\beta$ -Mercaptoethanol (Merck Millipore), 240 U/ml LIF (Cell guidance systems) and PD0325901 (1  $\mu$ M) and GSK3 $\beta$  inhibitor CHIR99021 (3  $\mu$ M) (Selleckchem, USA) were added to the culture medium.

### **Generation of fluorescent reporter PSCs**

PSCs were infected with fluorescent reporter constructs before testing them in aggregation assays with diploid/tetraploid embryos. Therefore the lentiviral FUDGW-Tomato plasmid (Addgene #22771), psi-LVRU6MP mCherry (a gift from Alexey Ushmorov) and a lentiviral EGFP were used. Lentiviral particles were produced according to standard protocols (Wang et al., 2012) using psPax2 and pMD2 (Addgene #12260, #12259) as packaging plasmids in LentiX HEK293T cells (Clontech).

TBX3<sup>-/-</sup> iPSCs were infected directly with LentiX HEK293T supernatant for 8 h at 37° C. After 48 - 72 hrs, the reporter positive cells were detectable by flow cytometry and positive cells were isolated by sorting on a FACSAria II or III flow cytometer (BD).

For infection of TBX3BAC-GFP mESCs, viral supernatants from the HEK293T cells were mixed in a 50:50 ratio with ES Feeder medium + 2i and cells were infected in suspension twice over night. Infected cells were sorted according to their mCherry expression and grown in feeder free 2i/LIF conditions for making stocks. Cells were grown for at least 2 passages in Serum/LIF conditions to re-establish the TBX3 heterogeneity based on GFP expression. For embryo aggregation assays, mCherry positive TBX3BAC-GFP mESCs were FACS sorted into the respective TBX3<sup>GFP</sup>-low or TBX3<sup>GFP</sup>-high cell populations. To assess germline contribution of the TBX3<sup>-/-</sup> iPS cells, the EGFP-IRES-Pac cassette driven by the enhancer 3.5 kb upstream of Pou5f1 and the minimal human UbC promoter were introduced using the piggyBac transposon system.

### **Infection of PSCs with shRNA constructs**

TBX3<sup>+/+</sup> and TBX3<sup>-/-</sup> iPSCs were infected with shRNAs to knock down *Dppa3*. Therefore the SFFV pGipz plasmid was used. Lentiviral particles were produced according to standard protocols (Wang et al., 2012) using psPax2 and pMD2 (Addgene #12260, #12259) as packaging plasmids in LentiX HEK293T cells (Clontech).

For infection of TBX3<sup>+/+</sup> and TBX3<sup>-/-</sup> iPSCs with shRNA viruses, the filtered HEK293T supernatant was mixed in a 50:50 ratio with ES Feeder medium + 2i and cells were infected in suspension twice over night. Two different shRNA constructs were used and cells were also infected using a pool of both

shRNA viruses. Infected cells were sorted according to their GFP expression intensity on 0.2% gelatine coated 6 well or 96 well plates. Non-infected control cells were used to set the gates.

The following shRNAs were used in this work:

shRNA1 Dppa3 5'-CAGCAGATGTGAAAGCTATTT-3'

shRNA2 Dppa3 5'-GGCTGAGGAATAAAGTAAA-3'

### **Western Blot**

Western Blotting was performed according to standard procedures. Whole-cell extracts (50–100 µg) prepared using RIPA-lysis buffer containing 50 mM Tris HCl pH 8.0, 150 mM NaCl, 0,05% Na-Deoxycholat, 1% NP40, 0,01% SDS, 1 mM PMSF supplemented with Complete Protease Inhibitor Cocktail Tablets (Roche) were subjected to sodium dodecyl sulphate polyacrylamide gel electrophoresis (SDS-PAGE). Separated proteins were transferred to PVDF membranes (Millipore Corp., USA). Membranes were blocked using 5% dry milk in PBS containing 0.2% Tween 20. For subsequent washes, 0.2% Tween 20 in PBS was used. Membranes were incubated with primary antibodies over-night at 4° C on a rotator. The following primary antibodies were used: rabbit anti-TBX3 1:1000 (Invitrogen, #424800), goat anti- TBX3 1:1000 (Santa Cruz # sc-17871). Anti-β-ACTIN 1:10,000 (Sigma # 3101) was incubated for 1 hour at RT. This was followed by incubation with secondary horseradish peroxidase (HRP)–coupled antibodies diluted 1:3000, 1h at RT. Detection was performed with either ECL or ECL+ kits (Thermo scientific, USA).

### **Confocal microscopy**

Pre-implantation embryos were isolated according to standard protocols. Embryos were cultured in glass bottom dishes using M16 media and kept in a humidified atmosphere containing 5% CO<sub>2</sub> at 37° C. Confocal images were taken of live embryos using a Leica TCS-SP8-HCS microscope. Immunostaining on wildtype embryos was performed according to standard protocols using the following primary antibodies and dilutions: rat anti-NANOG (14-5761-80, eBioscience), 1:250; goat anti- TBX3 (sc-17871, Santa Cruz), 1:250; rabbit anti-PDGFRa (sc-338, Santa Cruz), 1:100.

### **FACS analysis and sorting**

Cells were washed with PBS and dissociated into single cell suspension by incubation with 0.25 % trypsin/EDTA (Millipore). The cells were re-suspended in 2 % FCS/PBS (FACS buffer) and analysed with a FACSAria II or III flow cytometer (BD). All events were gated with forward scatter and side scatter

profiles. The respective cell types were sorted according to fluorescent signal intensity in relation to negative controls.

### **Clonal formation assays**

SSEA1 positive, TBX3-EGFP reporter mESCs were single cell sorted at 10,000 cells/well or as single cells onto 96 well plates containing Mitomycin C inactivated MEFs. Cells were cultured with daily medium changes until colony formation and were counted under a light microscope and subsequently expanded for further analysis. Briefly, for SSEA1 staining cells were washed with PBS and trypsinised using 0,25 % Trypsin/EDTA (Milipore) for ~ 2 min at 37° C. Detached cells were dissociated via pipetting and the cells were resuspended in serum containing medium to stop trypsin reaction. Subsequently, the cells were centrifuged at 1300 rpm for 3 min, washed twice in FACS buffer and resuspended in FACS blocking buffer for 30 min at 4°C under shaking conditions. Cells were washed with FACS buffer and incubated with SSEA1 primary antibody (Cell Signaling MC-480, 1:1600) for 1.5 h at 4° C under shaking conditions. Afterwards, the cells were washed twice with FACS buffer and then incubated with the second antibody Alexa Fluor 647 Goat anti-mouse IgM  $\mu$  Chain (1:600) for 30 min at 4° C in the dark. Finally, the cells were washed again with FACS buffer, the pellet resuspended in 350  $\mu$ l FACS buffer containing 1:10,000 DAPI (Invitrogen #D3571) and transferred via a cellulose filter into FACS tubes. The cells were analyzed for viability (DAPI) and SSEA1-AlexaFluor 647.

### **Quantitative real time PCR**

RNA was extracted according to manufacturer's instructions using the GeneJet RNA Purification kit (Thermo Scientific) and eluted in 40  $\mu$ l RNase-free H<sub>2</sub>O. Each RNA preparation was tested for genomic DNA contamination by replacing reverse transcriptase with water. cDNA was subsequently synthesized using the iScript cDNA synthesis kit (BioRad). Quantitative real time PCR was performed using SensiMix™ SYBR® No-ROX Kit (Bioline #QT650-05) according to supplier's instruction manual using 100ng cDNA as a template in a Qiagen Rotor Gene qPCR Cycloer (Qiagen). Internal standards (house-keeping gene) and samples were simultaneously amplified. Details have been described elsewhere (Kleger et al., 2012; Kleger et al., 2010; Muller et al., 2012). QuantiTect Primer Assays were used throughout this study (Qiagen, Germany, <http://www.qiagen.com/de/products/catalog/assay-technologies/real-time-pcr-and-rt-pcr-reagents/quantitect-primer-assays/>). Primer information is provided in **Supplemental Table 1**.



## Immunohistochemistry

Cells at different time points of differentiation were fixed using 4% paraformaldehyde (PFA). Samples were then subjected to treatment with  $\text{NH}_4\text{Cl}$  and blocking with 0.3-0.5% TritonX-containing BSA before incubation with the primary antibodies. Rabbit anti Nanog (Cosmo Bio Co, LTD. #REC-RCAB0002P-F), 1:250, over-night at 4° C; rabbit anti-murineTBX3 was kindly provided by Hitoshi Niwa (Toyooka et al., 2008), 1:1000, over-night at 4° C, mouse anti-OCT4 (Santa Cruz sc-5279 (Lot #3010)) 1:100, overnight at 4° C; mouse anti-SSEA1 (Cell Signalling #4744), 1:200, 1h at RT. Samples were further incubated with fluorescence labelled secondary antibodies Alexa Fluor® 488 (green), Alexa Fluor® 568 (red) (Life-technologies, all diluted 1:500). Nuclei were stained with DAPI (blue) (1:10,000). Images were captured using an upright fluorescence Zeiss Axioimager Z1 microscope and analysed using Axiovision software (Zeiss, Germany).

## Cell Cycle Analysis

To analyse cell cycle distribution in detail cells were treated with 20  $\mu\text{M}$  BrdU (5-bromo-2'-deoxyuridine) for 60 min in their respective medium. Cells were harvested by 0,05% Trypsin, reaction was stopped by adding respective culture medium and  $2 \times 10^6$  cells per sample were washed twice in PBS/1% BSA and resuspended in 200  $\mu\text{l}$  PBS. Cell suspension was added dropwise to 70% ice-cold ethanol for fixation. After 30 min on ice cells were centrifuged for 10 min at 500 x g, pellet was loosened by vortexing and 1ml 2N HCl/0,5% Triton-X was added dropwise while vortexing. Cells were incubated at RT for 30 min to produce single stranded DNA molecules. After 10 min centrifugation at 500 x g pellet was resuspended in 1ml 0,1 M  $\text{Na}_2\text{B}_4\text{O}_7 \times 10 \text{ H}_2\text{O}$ , pH 8.5 for neutralisation. Cells were centrifuged 10 min at 500 x g and the pellet resuspended in 100  $\mu\text{l}$  PBS/1% BSA/0,5% Tween20. 1  $\mu\text{l}$  of BrdU-APC-Antibody (BD Biosciences, # 560209) was added to each sample to obtain a final dilution of 1:100. After 30 min incubation at RT 1 ml PBS/1% BSA was added, cells were centrifuged for 10 min at 500 x g and finally resuspended in 1 ml PBS containing 5  $\mu\text{g/ml}$  Propidium Iodide (PI) (Life Technologies, # P3566). Cells were analysed on an LSR II flow cytometer (BD Biosciences) measuring the PI-signal linear. iPSCs without BrdU treatment were used as controls.

## Characterisation of the Tbx3-null state

The self-renewal capacity of  $\text{TBX3}^{+/+}$  and  $\text{TBX3}^{\text{ven/ven}}$  ESCs was compared by mixing the cells in a 50:50 ratio and co-culturing them for 3 passages under LIF/2i conditions. FACS analysis for the venus expression was performed at the start and at the end of the experiment.

Differences in colony formation when gradually withdrawing one or two components of the LIF/2i condition, were investigated. For this purpose, cells were seeded in clonal density with 125 cells/cm<sup>2</sup> in a serum-free medium using the N2B27 as a backbone.

To compare if the TBX3<sup>-/-</sup> cells showed accelerated or delayed differentiation, TBX3<sup>ven/ven</sup> and WT cells were seeded in ES-Feeder + 2i and the next day LIF and 2i were withdrawn from the medium to induce differentiation. Morphology, pluripotency and lineage marker expression were checked before, 24 h, 48 h and 72 h after LIF/2i removal.

### **Genotyping**

DNA was extracted from cells or tissue according to standard protocols. Briefly, cells/tissues were lysed using Lysing buffer + 10% SDS and 0.5 % Proteinase K for 3 h at 56 ° C, the reaction was stopped with 5 M NaCl and the sample was centrifuged for 10 min at RT at 13,300 rpm. DNA containing supernatant was precipitated with isopropanol, the pellet washed with EtOH, dried and DNA was solved in H<sub>2</sub>O for 1h at 37° C. The DNA was amplified using specific primer pairs as outlined in **Supplemental Table 1**. Finally the PCR product was separated using gel electrophoresis in a 1.2% agarose gel with Ethidium Bromide and visualized using the GenoSmart2 gel documentation system.

### **Microarray data analysis**

The DNA microarray data were pre-processed and normalized by the limma package (Wettenhall and Smyth, 2004). The differentially expressed genes of a pair-wise comparison were detected using limma t-test with criteria of fold change > 2 and p-value < 0.05. The p-value was further adjusted by the procedure of Benjamini and Hochberg (Klipper-Aurbach et al., 1995). Additionally, the TBX3 induced genes were detected using public dataset of *Tbx3* knock down (*Tbx3* shRNA transient transfection of 72h) ESCs (GSE26520) using limma t-test with a relax fold change cut-off (> 1.5) and adjust p-value < 0.05. To perform cross-platform analysis, published microarray data (GSE11274, GSE35416, GSE58735) were retrieved from NCBI GEO and were adjusted by the Combat algorithm (Westermeyer et al., 2007) to minimize batch effects. The specific gene sets, PluriNet, Epiblast, DNA methylation (GO0006306) were collected from (Consortium, 2009; Kurek et al., 2015; MacArthur et al., 2012; Muller et al., 2008; Nora et al., 2012), respectively. The gene set enrichment analysis was performed by customized R-GSEA script (Subramanian et al., 2005).

The network, including pluripotency makers (Dunn et al., 2014) and TBX3 target genes (GSE19219, (Han et al., 2010)) were generated using the STRING database (Franceschini et al., 2013) and visualized by Cytoscape (Saito et al., 2012). The pluripotency makers were organized in the inner layer of the network, whereas TBX3 target genes being differently regulated between wild-type and TBX3 null ESCs

were selected and placed in the outer layer. The edges in the network represent the reliable interactions between two genes that had a high confidence score ( $>0.7$ ) from the STRING database or between TBX3 and its target genes defined by a TBX3 ChIP-seq experiment (Han et al., 2010). The gene expression data of wild-type and TBX3 null ESCs were overlaid on to the network, reflecting the TBX3 induced or repressed changes in the network.

### **Single-cell gene expression analysis**

Gene expression analysis of FACS-sorted single ESCs, that were kept in lysis buffer containing 9  $\mu$ l RT-PreAmp Master Mix (5.0  $\mu$ l Cells Direct 2 $\times$  RXN Mix (Invitrogen), 2.5  $\mu$ l 0.2 $\times$  assay pool, 0.2  $\mu$ l Superscript III Reverse Transcriptase (Invitrogen) and 1.3  $\mu$ l TE buffer (Ambion), was performed for TBX3 and DPPA3 with the Dynamic Array chips (Fluidigm). The amount of targeted transcripts was quantified using TaqMan real-time PCR on the BioMark Real-Time PCR system (Fluidigm). TaqMan gene expression assays (AppliedBiosystems) and 96.96 Dynamic Arrays (Fluidigm) were applied. We analyzed the Ct values achieved from the BioMark System with GenEx software from MultiD analysis.

### **Analyses of single cells from published data sets**

Single-cell RNA-Seq data at 8-cell, 16-cell, early blastocyst and late blastocyte stage were retrieved from Deng et al. Science 2014 (GSE45719)(Deng et al., 2014). The gene expression values (measured as RPKM) were extracted and log<sub>2</sub> transformed. The gene expression values were represented in violin plots or boxplots to visualize the expression heterogeneity. The lineage bias (ICM or TE) of individual cells was determined using a panel of 48 genes selected by Guo et al. 2010 (Guo et al., 2010) at different stages, respectively.

### **Aggregation of PSCs with diploid (2n) and tetraploid (4n) embryos**

All (C57BL/6 x C3H) F1 female mice for embryo collection were treated with 7.5 IU pregnant mare serum gonadotropin (PMSG) and 7.5 IU human chorionic gonadotropin (HCG) in 48 hours apart and then crossed with CD1 male mice. 2n eight-cell embryos were flushed from female mice at 2.5 days postcoitum (dpc) and placed in M2 medium (Hogan et al., 1986).

To make 4n embryos, two-cell embryos were flushed at 1.2 dpc from oviducts of (C57BL/6 x C3H) F1 female mice and fused with a Cellfusion CF-150/B apparatus in a 250- $\mu$ m gap electrode chamber (BTX-450, BLS Ltd., Budapest, Hungary) containing 0.3 M Mannitol with 0.3% bovine serum albumin (Sigma-Aldrich Inc., St. Louis, MO). An initial electrical field of 2V was applied to the embryos, followed by one peak pulses of 50V for 35  $\mu$ s. Embryos were transferred back into potassium simplex optimized medium (KSOM) (Ho et al., 1995) immediately to a 37°C incubator with 5% CO<sub>2</sub>, observed for fusion

after 15 to 60 minutes. Unfused embryos were discarded after 60 minutes. The fused 4n embryos were cultured for 24 hrs to the 4-cell stage under the same conditions (Nagy et al., 1993).

Trypsin-digested PSCs (8-12 cells for 2n embryos or 15-18 cells for 4n embryos per aggregate) were transferred into a depression in the microdrop of KSOM; Meanwhile, batches of 30-50 embryos were briefly incubated in acidified Tyrode's solution (Hogan et al., 1986) until dissolution of their zona pellucida. A single 2n embryo or two 4n embryos were placed in each depression. All aggregates were cultured overnight at 37°C, 5% CO<sub>2</sub>. After 24 hours of culture, the majority of aggregates had formed blastocysts. We transferred 10-14 embryos into one uterine horn of a 2.5dpc pseudopregnant recipient. Seven or 9 days after embryo transfer, E9.5 and E11.5 fetuses were collected from the recipients and analysed.

### **Mouse strains**

(C57BL/6 x C3H) F1 female mice and CD1 male mice used in aggregation experiments of PSCs with diploid or tetraploid embryos were housed in the animal facility of the Max Planck Institute of Molecular Biomedicine in Münster according to the German animal protection law. TBX3-venus mice were kindly provided by Vincent Christoffels (Kunasegaran et al., 2014) and subsequently housed in the animal facility of Ulm University according to the German animal protection law. TBX3-Bac GFP mice were also kindly provided by Vincent Christoffels (Horsthuis et al., 2009). The nomenclature TBX3<sup>-/-</sup> iPSCs in the current manuscript refers to the previously described TBX3 conditional allele that is a true null in the recombined state (TBX3<sup>Δflox/Δflox</sup> for homozygous deletion and TBX3<sup>Δflox/+</sup> for heterozygous deletion) (Frank et al., 2013).

## Supplemental References

Bryja, V., Bonilla, S., and Arenas, E. (2006). Derivation of mouse embryonic stem cells. *Nature protocols* 1, 2082-2087.

Consortium, R.G.G.o.t.G.O. (2009). The Gene Ontology's Reference Genome Project: a unified framework for functional annotation across species. *PLoS Comput Biol* 5, e1000431.

Czechanski, A., Byers, C., Greenstein, I., Schrode, N., Donahue, L.R., Hadjantonakis, A.K., and Reinholdt, L.G. Derivation and characterization of mouse embryonic stem cells from permissive and nonpermissive strains. *Nature protocols* 9, 559-574.

Deng, Q., Ramskold, D., Reinius, B., and Sandberg, R. (2014). Single-cell RNA-seq reveals dynamic, random monoallelic gene expression in mammalian cells. *Science* 343, 193-196.

Dunn, S.J., Martello, G., Yordanov, B., Emmott, S., and Smith, A.G. (2014). Defining an essential transcription factor program for naive pluripotency. *Science* 344, 1156-1160.

Franceschini, A., Szklarczyk, D., Frankild, S., Kuhn, M., Simonovic, M., Roth, A., Lin, J., Minguez, P., Bork, P., von Mering, C., *et al.* (2013). STRING v9.1: protein-protein interaction networks, with increased coverage and integration. *Nucleic Acids Res* 41, D808-815.

Frank, D.U., Emechebe, U., Thomas, K.R., and Moon, A.M. (2013). Mouse TBX3 mutants suggest novel molecular mechanisms for Ulnar-mammary syndrome. *PLoS one* 8, e67841.

Guo, G., Huss, M., Tong, G.Q., Wang, C., Li Sun, L., Clarke, N.D., and Robson, P. (2010). Resolution of cell fate decisions revealed by single-cell gene expression analysis from zygote to blastocyst. *Developmental cell* 18, 675-685.

Han, J., Yuan, P., Yang, H., Zhang, J., Soh, B.S., Li, P., Lim, S.L., Cao, S., Tay, J., Orlov, Y.L., *et al.* (2010). Tbx3 improves the germ-line competency of induced pluripotent stem cells. *Nature* 463, 1096-1100.

Ho, Y., Wigglesworth, K., Eppig, J.J., and Schultz, R.M. (1995). Preimplantation development of mouse embryos in KSOM: augmentation by amino acids and analysis of gene expression. *Mol Reprod Dev* 41, 232-238.

Hogan, B., Costantini, F., and Lacy, B. (1986). *Manipulating the mouse embryo; a laboratory manual*. Cold Spring Harbour Laboratory Press.

Horsthuis, T., Buermans, H.P., Brons, J.F., Verkerk, A.O., Bakker, M.L., Wakker, V., Clout, D.E., Moorman, A.F., t Hoen, P.A., and Christoffels, V.M. (2009). Gene expression profiling of the forming atrioventricular node using a novel tbx3-based node-specific transgenic reporter. *Circulation research* 105, 61-69.

Illing, A., Stockmann, M., Swamy Telugu, N., Linta, L., Russell, R., Muller, M., Seufferlein, T., Liebau, S., and Kleger, A. (2013). Definitive Endoderm Formation from Plucked Human Hair-Derived Induced Pluripotent Stem Cells and SK Channel Regulation. *Stem cells international* 2013, 360573.

Kito, S., and Ohta, Y. (2005). Medium effects on capacitation and sperm penetration through the zona pellucida in inbred BALB/c spermatozoa. *Zygote* 13, 145-153.

Kleger, A., Mahaddalkar, P.U., Katz, S.F., Lechel, A., Joo, J.Y., Loya, K., Lin, Q., Hartmann, D., Liebau, S., Kraus, J.M., *et al.* (2012). Increased reprogramming capacity of mouse liver progenitor cells, compared with differentiated liver cells, requires the BAF complex. *Gastroenterology* 142, 907-917.

Kleger, A., Seufferlein, T., Malan, D., Tischendorf, M., Storch, A., Wolheim, A., Latz, S., Protze, S., Porzner, M., Proepper, C., *et al.* (2010). Modulation of calcium-activated potassium channels induces cardiogenesis of pluripotent stem cells and enrichment of pacemaker-like cells. *Circulation* 122, 1823-1836.

Klipper-Aurbach, Y., Wasserman, M., Braunspiegel-Weintrob, N., Borstein, D., Peleg, S., Assa, S., Karp, M., Benjamini, Y., Hochberg, Y., and Laron, Z. (1995). Mathematical formulae for the prediction of the residual beta cell function during the first two years of disease in children and adolescents with insulin-dependent diabetes mellitus. *Med Hypotheses* 45, 486-490.

Kunasegaran, K., Ho, V., Chang, T.H., De Silva, D., Bakker, M.L., Christoffels, V.M., and Pietersen, A.M. (2014). Transcriptional repressor Tbx3 is required for the hormone-sensing cell lineage in mammary epithelium. *PloS one* 9, e110191.

Kurek, D., Neagu, A., Tastemel, M., Tuysuz, N., Lehmann, J., van de Werken, H.J., Philipsen, S., van der Linden, R., Maas, A., van, I.W.F., *et al.* (2015). Endogenous WNT Signals Mediate BMP-Induced and Spontaneous Differentiation of Epiblast Stem Cells and Human Embryonic Stem Cells. *Stem cell reports* 4, 114-128.

Liebau, S., Mahaddalkar, P.U., Kestler, H.A., Illing, A., Seufferlein, T., and Kleger, A. (2013). A hierarchy in reprogramming capacity in different tissue microenvironments: what we know and what we need to know. *Stem cells and development* 22, 695-706.

Liebau, S., Stockmann, M., Illing, A., Seufferlein, T., and Kleger, A. (2014). [Induced pluripotent stem cells. A new resource in modern medicine]. *Der Internist* 55, 460-469.

MacArthur, B.D., Sevilla, A., Lenz, M., Muller, F.J., Schuldt, B.M., Schuppert, A.A., Ridden, S.J., Stumpf, P.S., Fidalgo, M., Ma'ayan, A., *et al.* (2012). Nanog-dependent feedback loops regulate murine embryonic stem cell heterogeneity. *Nature cell biology* 14, 1139-1147.

Muller, F.J., Laurent, L.C., Kostka, D., Ulitsky, I., Williams, R., Lu, C., Park, I.H., Rao, M.S., Shamir, R., Schwartz, P.H., *et al.* (2008). Regulatory networks define phenotypic classes of human stem cell lines. *Nature* 455, 401-405.

Muller, M., Schroer, J., Azoitei, N., Eiseler, T., Bergmann, W., Kohntop, R., Lin, Q., Costa, I.G., Zenke, M., Genze, F., *et al.* (2015). A time frame permissive for Protein Kinase D2 activity to direct angiogenesis in mouse embryonic stem cells. *Scientific reports* 5, 11742.

Muller, M., Stockmann, M., Malan, D., Wolheim, A., Tischendorf, M., Linta, L., Katz, S.F., Lin, Q., Latz, S., Brunner, C., *et al.* (2012). Ca<sup>2+</sup> activated K channels-new tools to induce cardiac commitment from pluripotent stem cells in mice and men. *Stem cell reviews* 8, 720-740.

Nagy, A., Rossant, J., Nagy, R., Abramow-Newerly, W., and Roder, J.C. (1993). Derivation of completely cell culture-derived mice from early-passage embryonic stem cells. *Proc Natl Acad Sci U S A* 90, 8424-8428.

Nora, E.P., Lajoie, B.R., Schulz, E.G., Giorgetti, L., Okamoto, I., Servant, N., Piolot, T., van Berkum, N.L., Meisig, J., Sedat, J., *et al.* (2012). Spatial partitioning of the regulatory landscape of the X-inactivation centre. *Nature* 485, 381-385.

Saito, R., Smoot, M.E., Ono, K., Ruscheinski, J., Wang, P.L., Lotia, S., Pico, A.R., Bader, G.D., and Ideker, T. (2012). A travel guide to Cytoscape plugins. *Nat Methods* 9, 1069-1076.

Subramanian, A., Tamayo, P., Mootha, V.K., Mukherjee, S., Ebert, B.L., Gillette, M.A., Paulovich, A., Pomeroy, S.L., Golub, T.R., Lander, E.S., *et al.* (2005). Gene set enrichment analysis: a knowledge-based approach for interpreting genome-wide expression profiles. *Proc Natl Acad Sci U S A* 102, 15545-15550.

Toyooka, Y., Shimosato, D., Murakami, K., Takahashi, K., and Niwa, H. (2008). Identification and characterization of subpopulations in undifferentiated ES cell culture. *Development* 135, 909-918.

Wang, J., Sun, Q., Morita, Y., Jiang, H., Gross, A., Lechel, A., Hildner, K., Guachalla, L.M., Gompf, A., Hartmann, D., *et al.* (2012). A differentiation checkpoint limits hematopoietic stem cell self-renewal in response to DNA damage. *Cell* 148, 1001-1014.

Warlich, E., Kuehle, J., Cantz, T., Brugman, M.H., Maetzig, T., Galla, M., Filipczyk, A.A., Halle, S., Klump, H., Scholer, H.R., *et al.* (2011). Lentiviral vector design and imaging approaches to visualize the early stages of cellular reprogramming. *Molecular therapy : the journal of the American Society of Gene Therapy* 19, 782-789.

Westermeyer, J., Sutherland, R.J., Freerks, M., Martin, K., Thuras, P., Johnson, D., Rossom, R., and Hurwitz, T. (2007). Reliability of sleep log data versus actigraphy in veterans with sleep disturbance and PTSD. *J Anxiety Disord* 21, 966-975.

Wettenhall, J.M., and Smyth, G.K. (2004). limmaGUI: a graphical user interface for linear modeling of microarray data. *Bioinformatics* 20, 3705-3706.

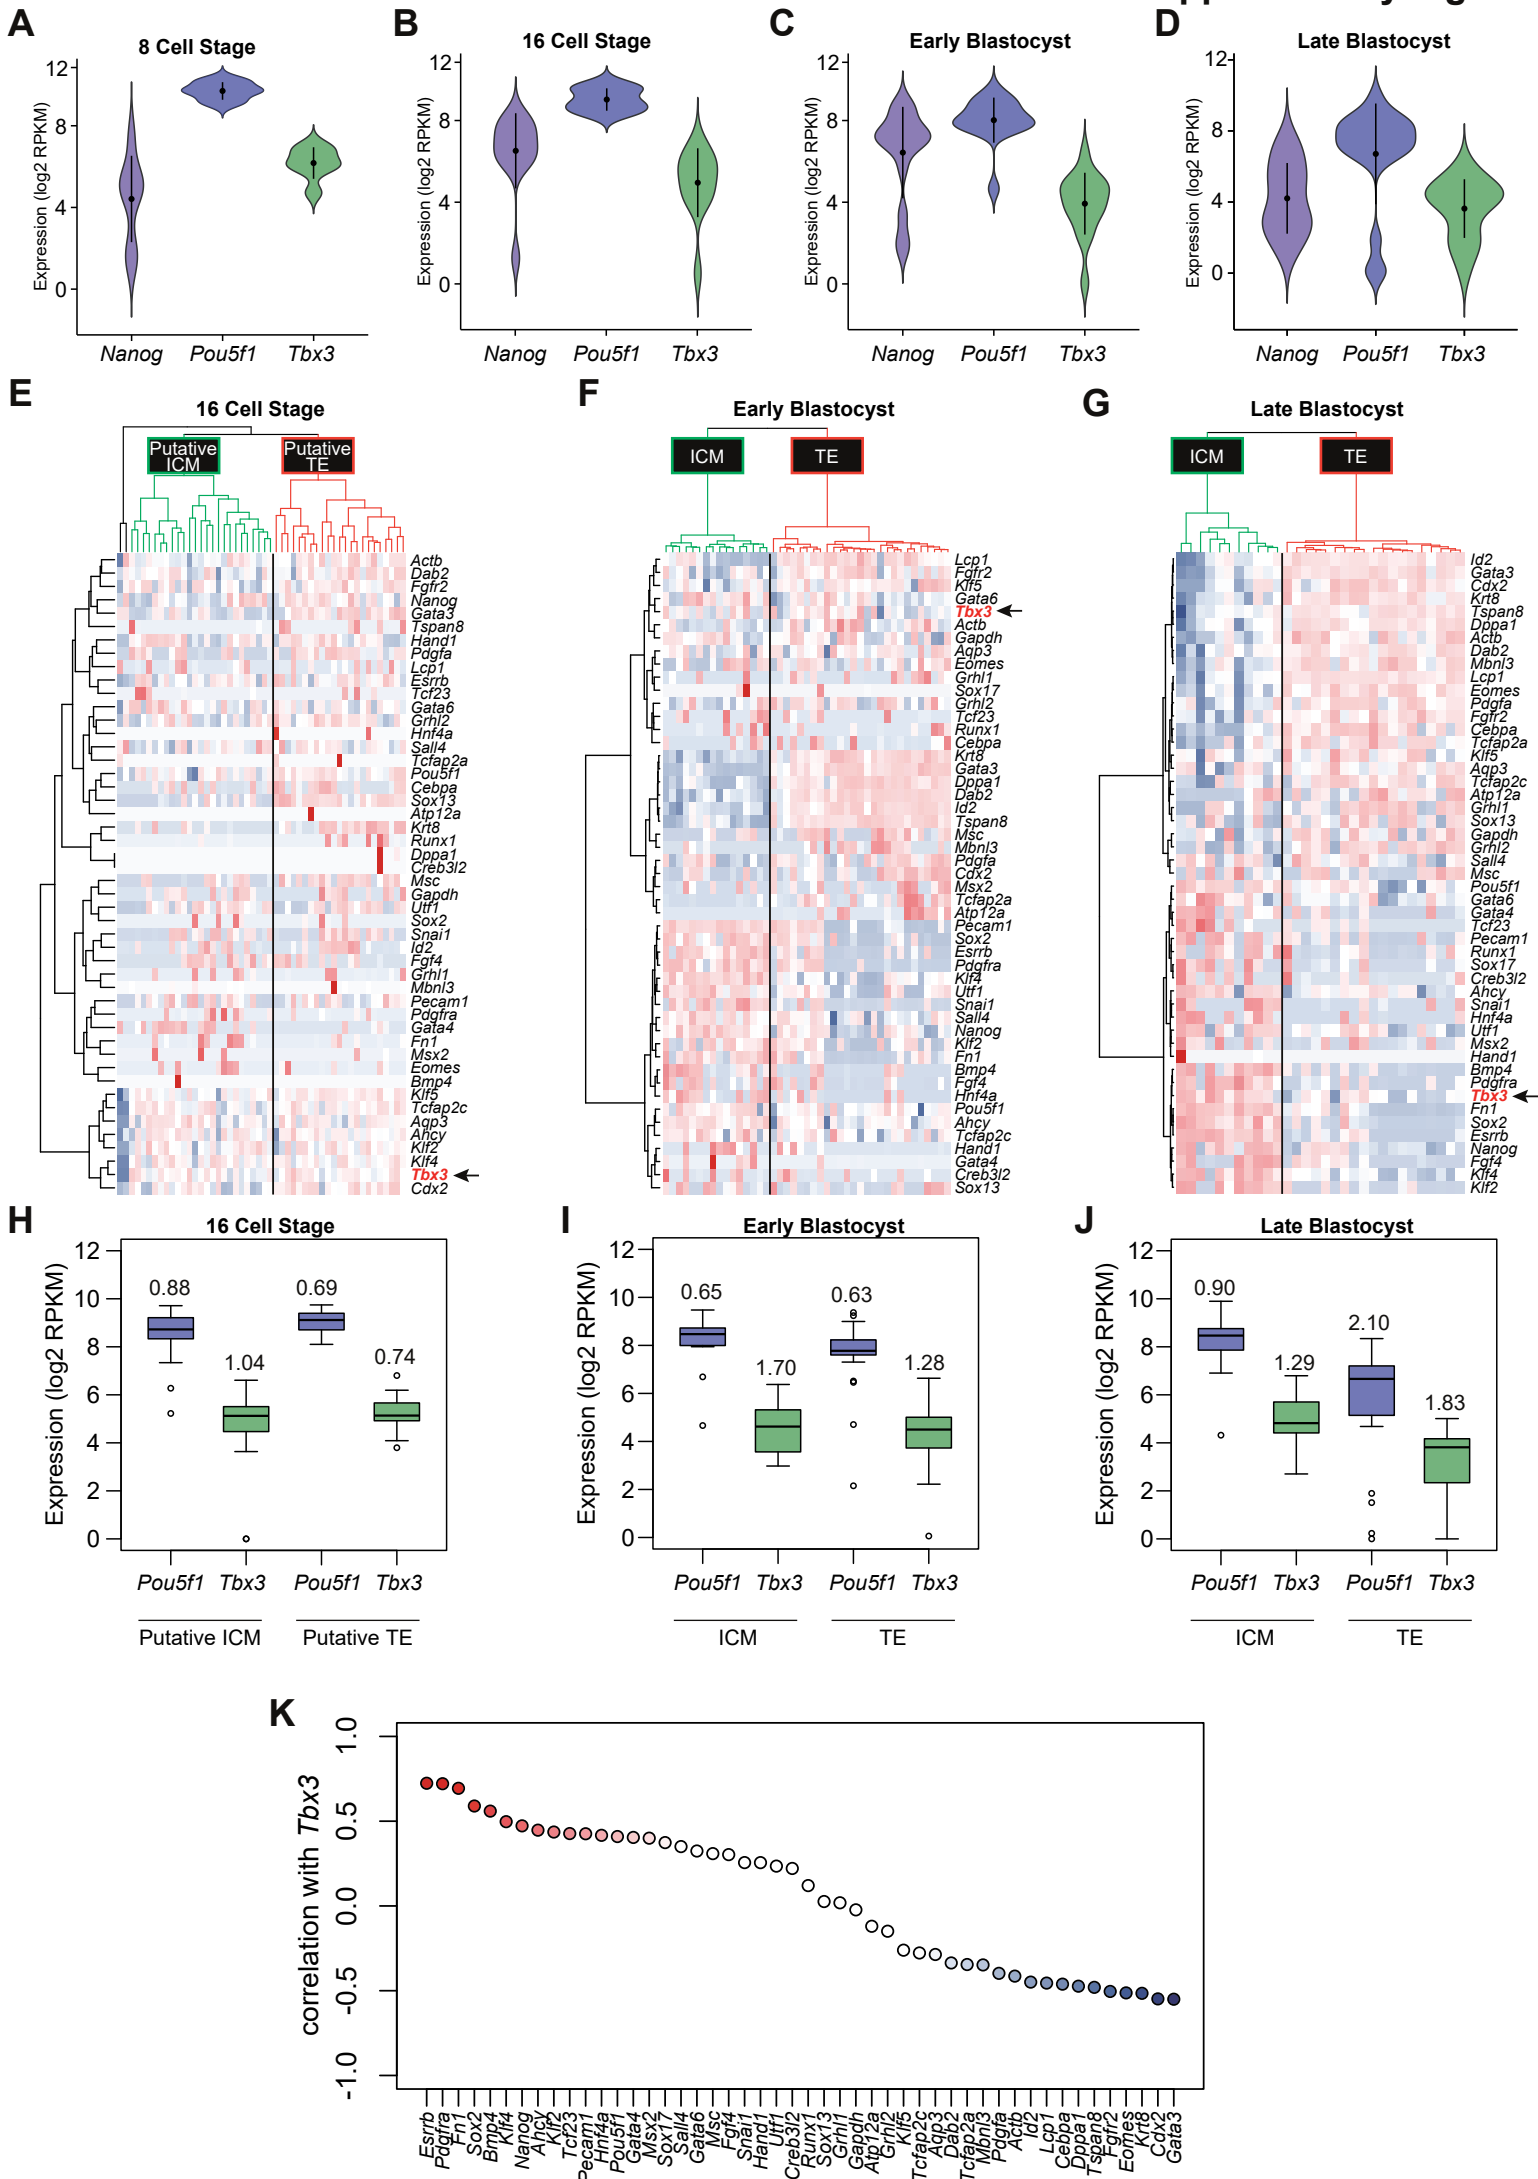



**A**

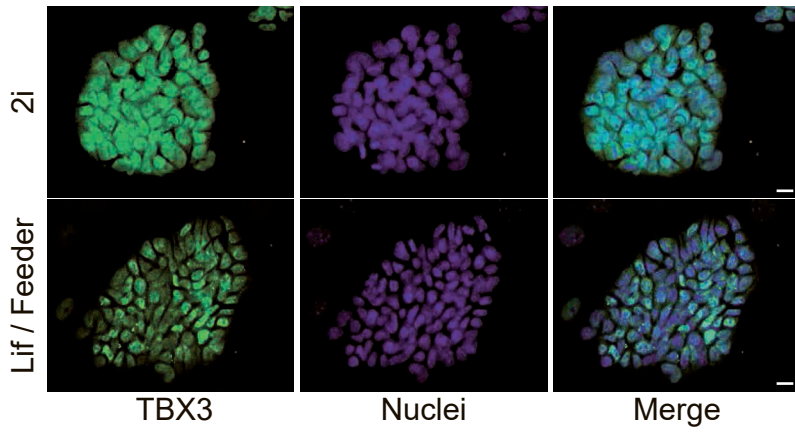

**B**

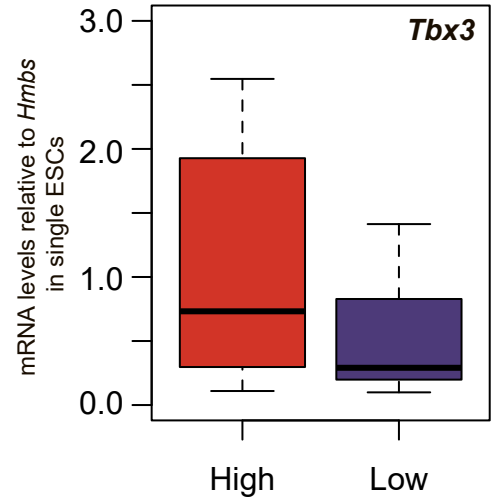

**C**

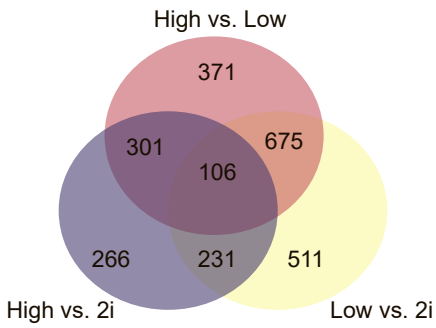

**D**

Grey: ESC specific  
Green: EpiSC specific  
Yellow: Differentiation specific

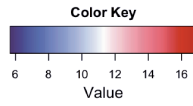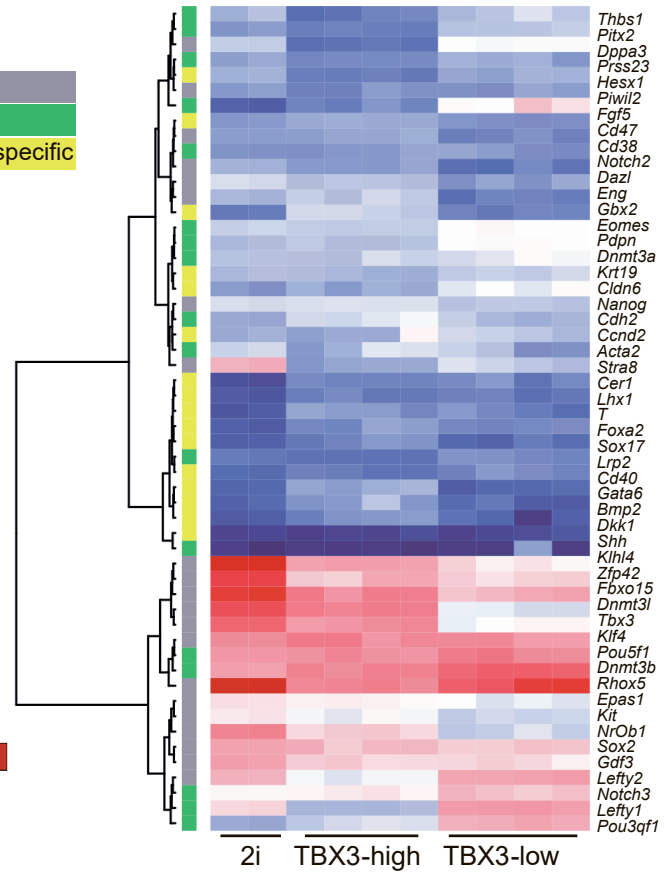

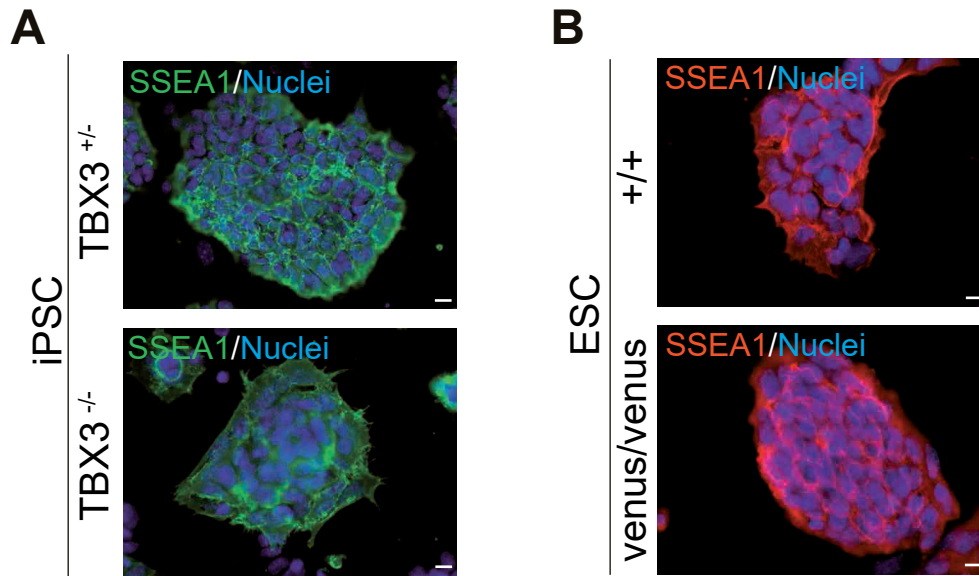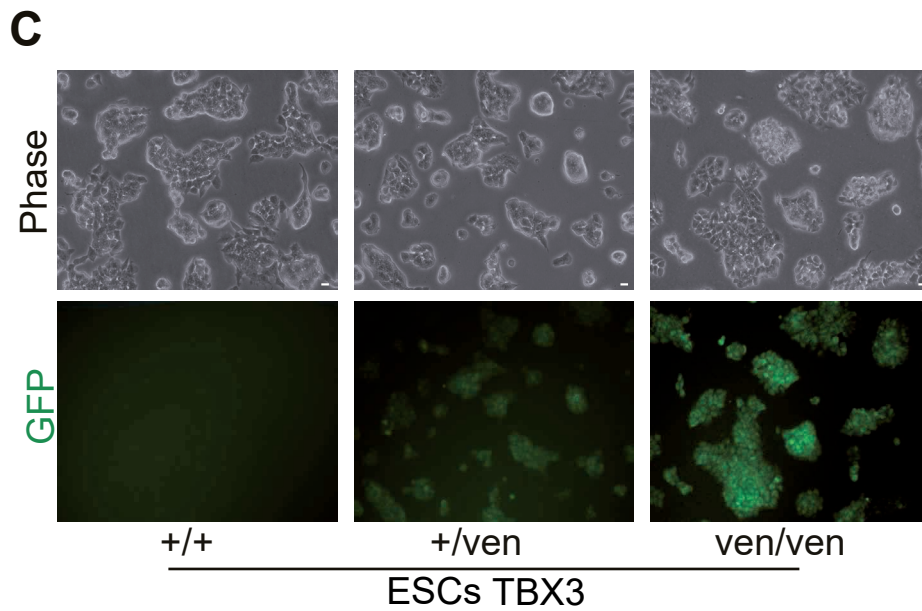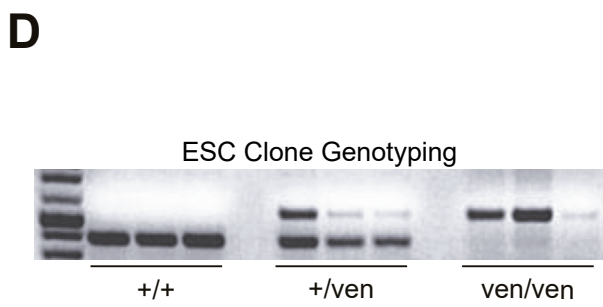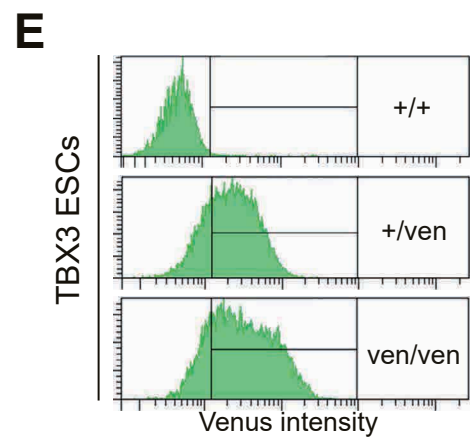

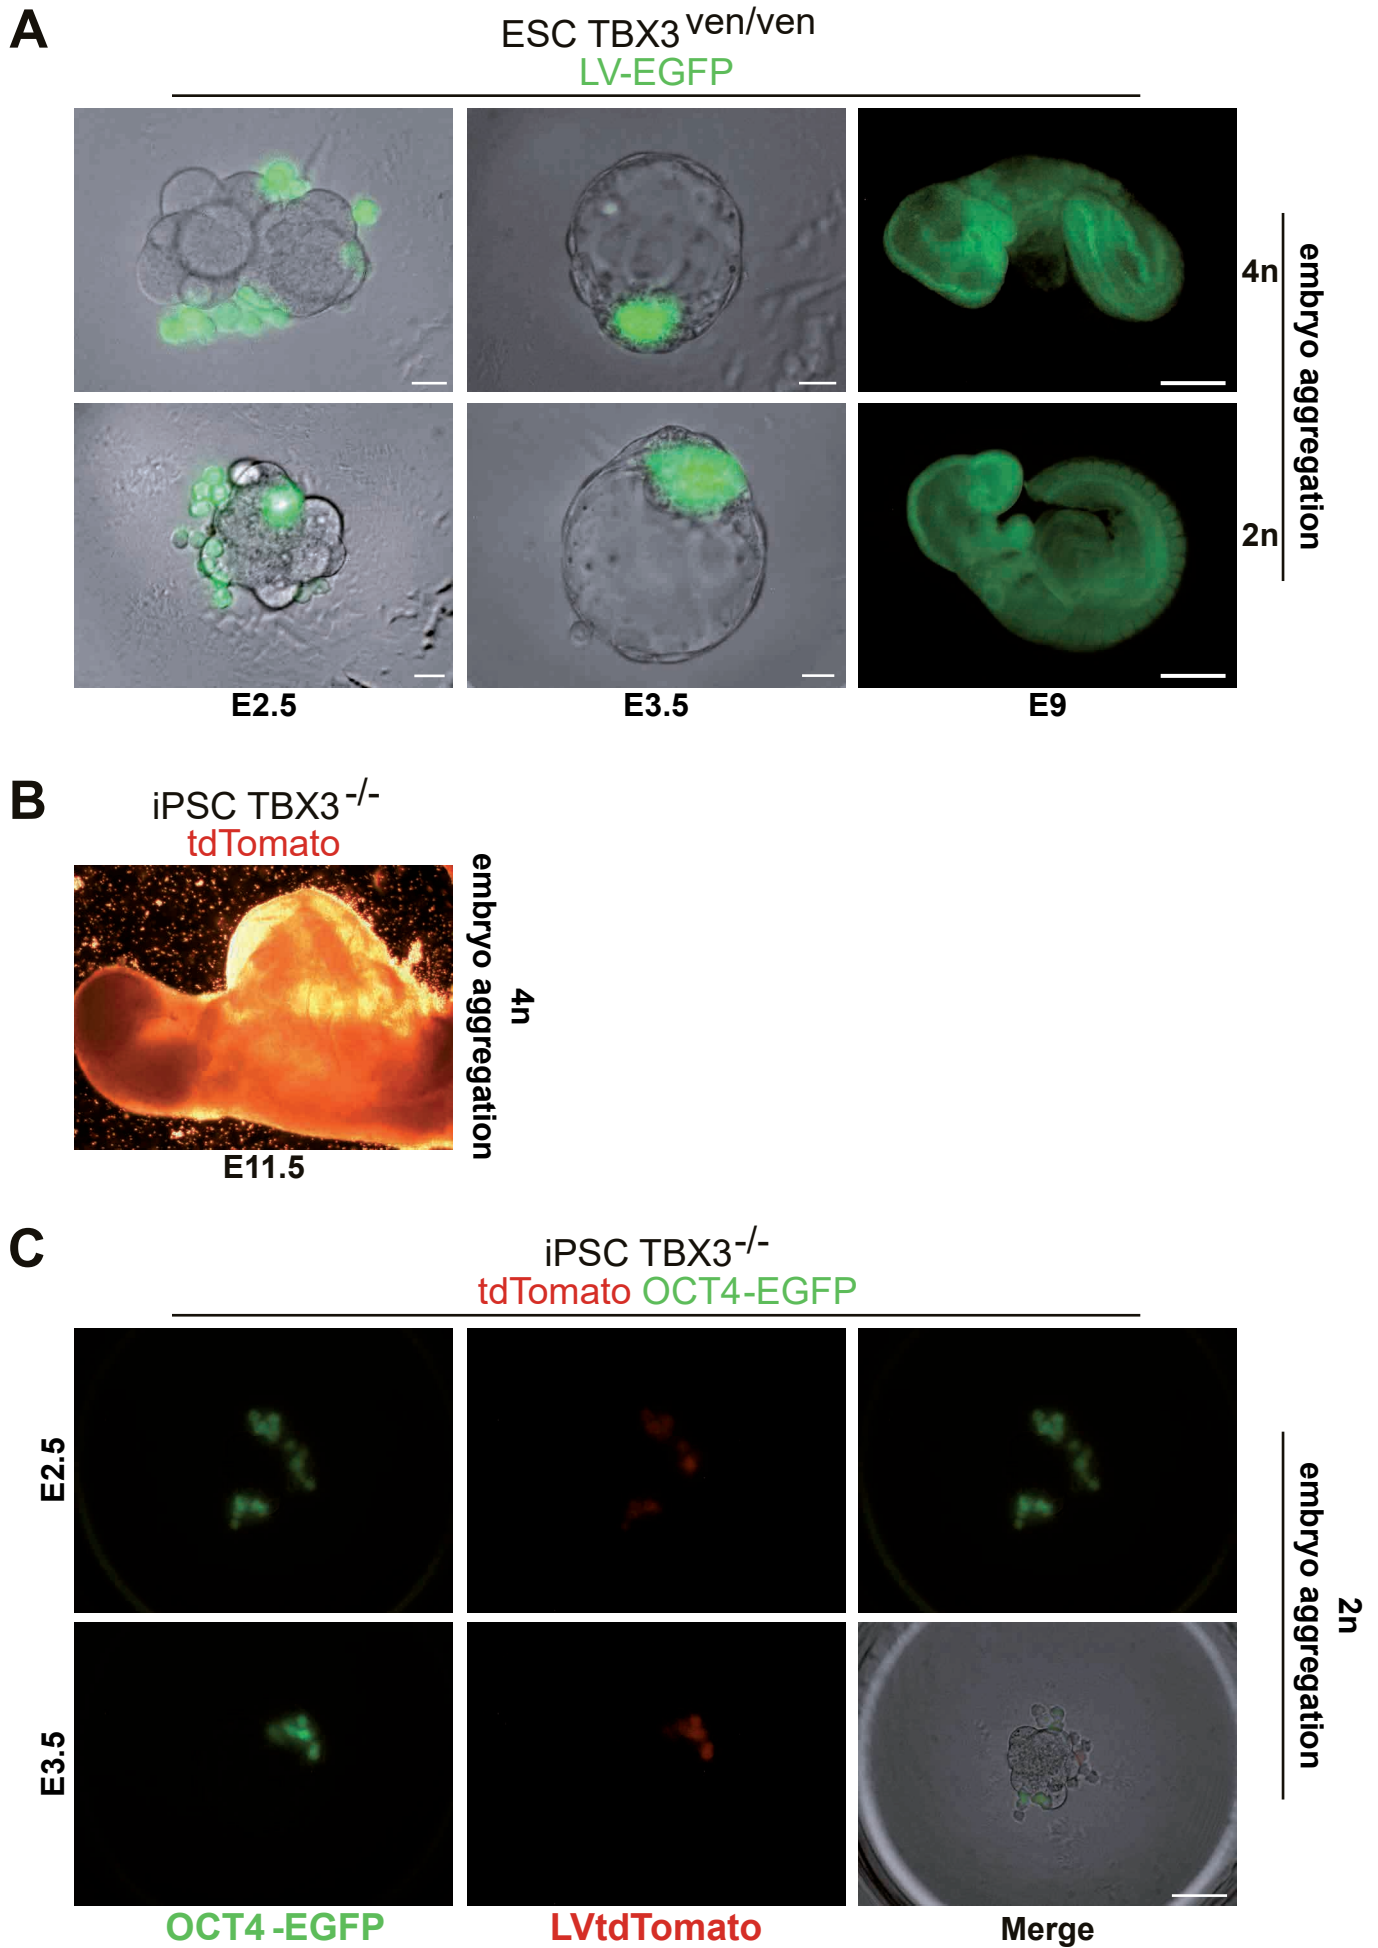

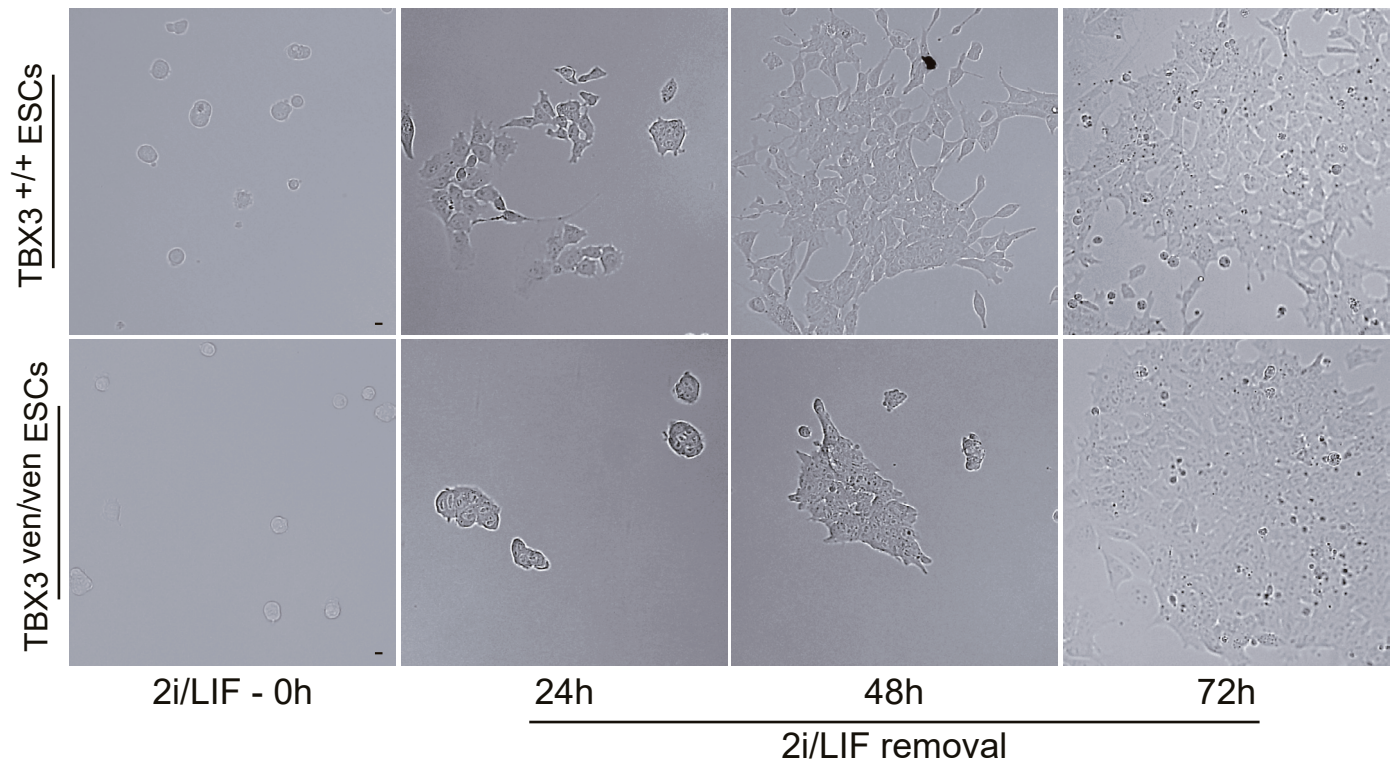

Supplement: mmc10.pdf [file mmc10.pdf]
